# Supplementary material for: A noncovalent interaction insight onto the concerted metallation deprotonation mechanism
Source: Royal Society of Chemistry journal article supplement (doi:10.1039/c9cp03650d), 2019-01-01
Supplement: c9cp03650d2.pdf [file c9cp03650d2.pdf]

## **A Noncovalent Interaction Insight onto the Concerted Metallation Deprotonation Mechanism.**

Yann Cornaton and Jean-Pierre Djukic\*

Electronic Supporting Information.

## Table of contents

|                                                                                                                             |    |
|-----------------------------------------------------------------------------------------------------------------------------|----|
| Geometries of anag for all four systems PdOAc, PdNHAc, NiOAc, NiNHAc .....                                                  | 3  |
| High resolution Figure 1b .....                                                                                             | 5  |
| Alternative representation of the IQA analysis of interactions within the metal- $C_{Ar}$ - $H_{Ar}$ - $O_{cis}$ site. .... | 7  |
| Energies of singlet state gas phase stationary geometries at the ZORA-PBE-D3(BJ)/all electron TZP level. ....               | 8  |
| AcOH .....                                                                                                                  | 8  |
| dmba .....                                                                                                                  | 8  |
| PdOAc .....                                                                                                                 | 9  |
| Pd <sub>3</sub> (OAc) <sub>6</sub> .....                                                                                    | 9  |
| anag .....                                                                                                                  | 9  |
| TS-ag .....                                                                                                                 | 9  |
| ag .....                                                                                                                    | 9  |
| TS-CH .....                                                                                                                 | 10 |
| McH* .....                                                                                                                  | 10 |
| Mc .....                                                                                                                    | 10 |
| PdNHAc .....                                                                                                                | 11 |
| anag .....                                                                                                                  | 11 |
| TS-ag .....                                                                                                                 | 11 |
| ag .....                                                                                                                    | 11 |
| TS-CH .....                                                                                                                 | 11 |
| McH .....                                                                                                                   | 12 |
| Mc .....                                                                                                                    | 12 |
| Acetamide-NH .....                                                                                                          | 12 |
| Acetamide-NH <sub>2</sub> .....                                                                                             | 13 |
| NiOAc .....                                                                                                                 | 14 |
| anag .....                                                                                                                  | 14 |
| TS-ag .....                                                                                                                 | 14 |
| ag .....                                                                                                                    | 14 |
| TS-CH .....                                                                                                                 | 14 |
| McH .....                                                                                                                   | 15 |
| Mc .....                                                                                                                    | 15 |
| NiNHAc .....                                                                                                                | 16 |
| anag .....                                                                                                                  | 16 |
| TS-ag .....                                                                                                                 | 16 |
| ag .....                                                                                                                    | 16 |
| TS-CH .....                                                                                                                 | 16 |
| McH .....                                                                                                                   | 17 |
| Mc .....                                                                                                                    | 17 |
| DLPNO-CCSD(T)/ def2-TVZP computations and LED analysis .....                                                                | 18 |

Geometries of anag for all four systems PdOAc, PdNHAc, NiOAc, NiNHAc

PdOAc-anag

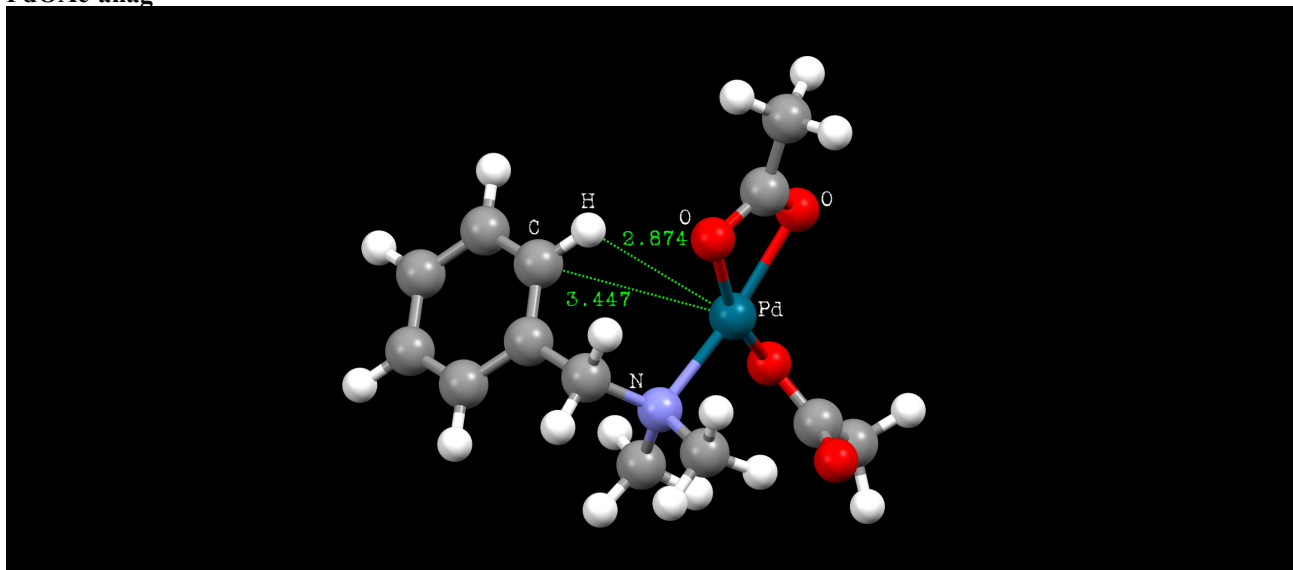

Figure S 1

PdNHAc-anag

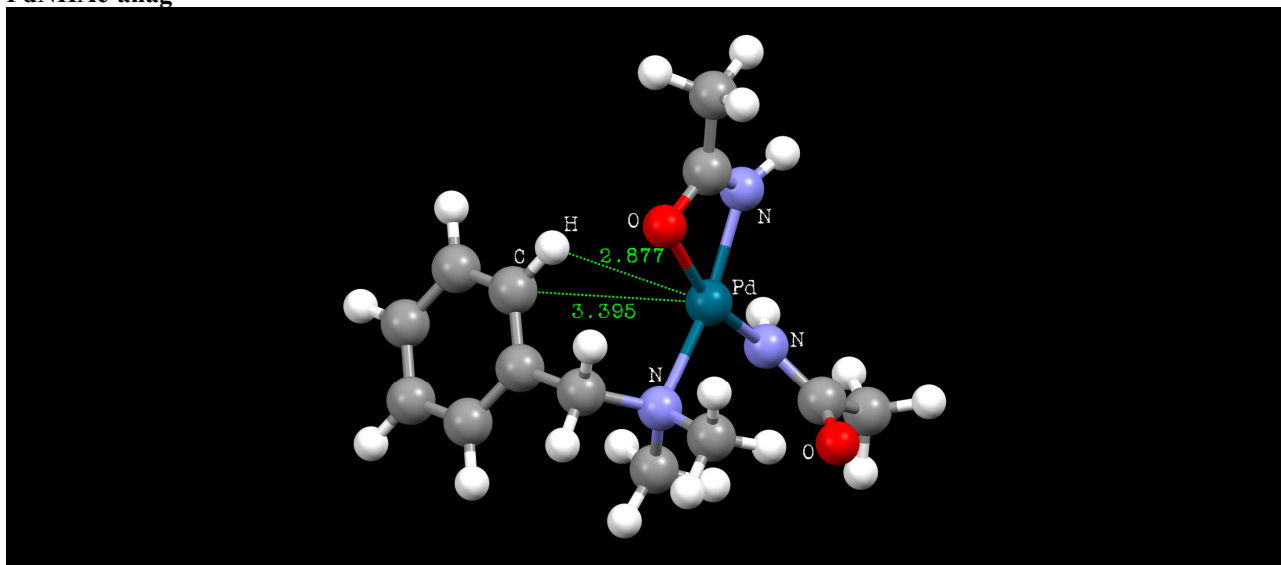

Figure S 2

NiOAc

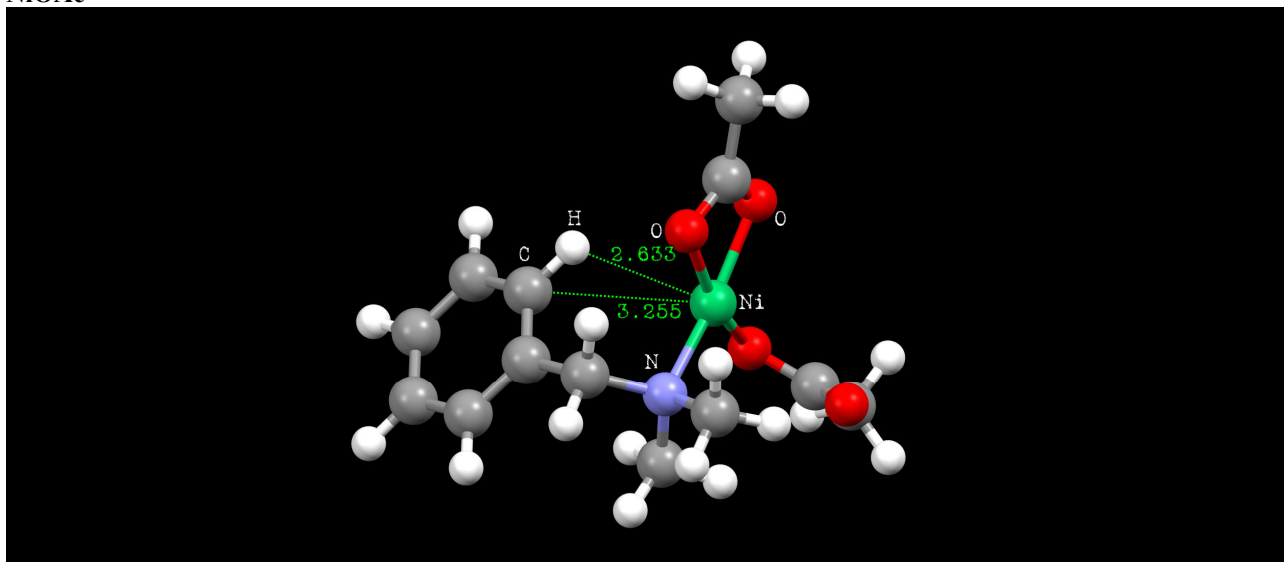

Figure S 3

NiNHAc

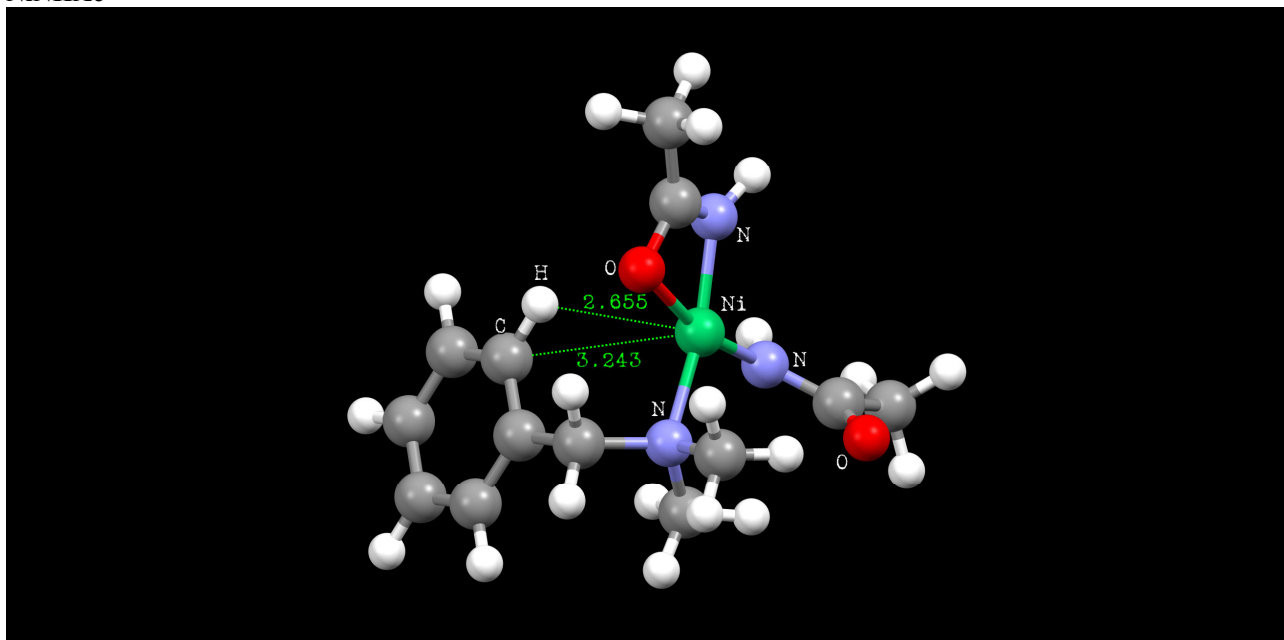

Figure S 4

High resolution Figure 1b

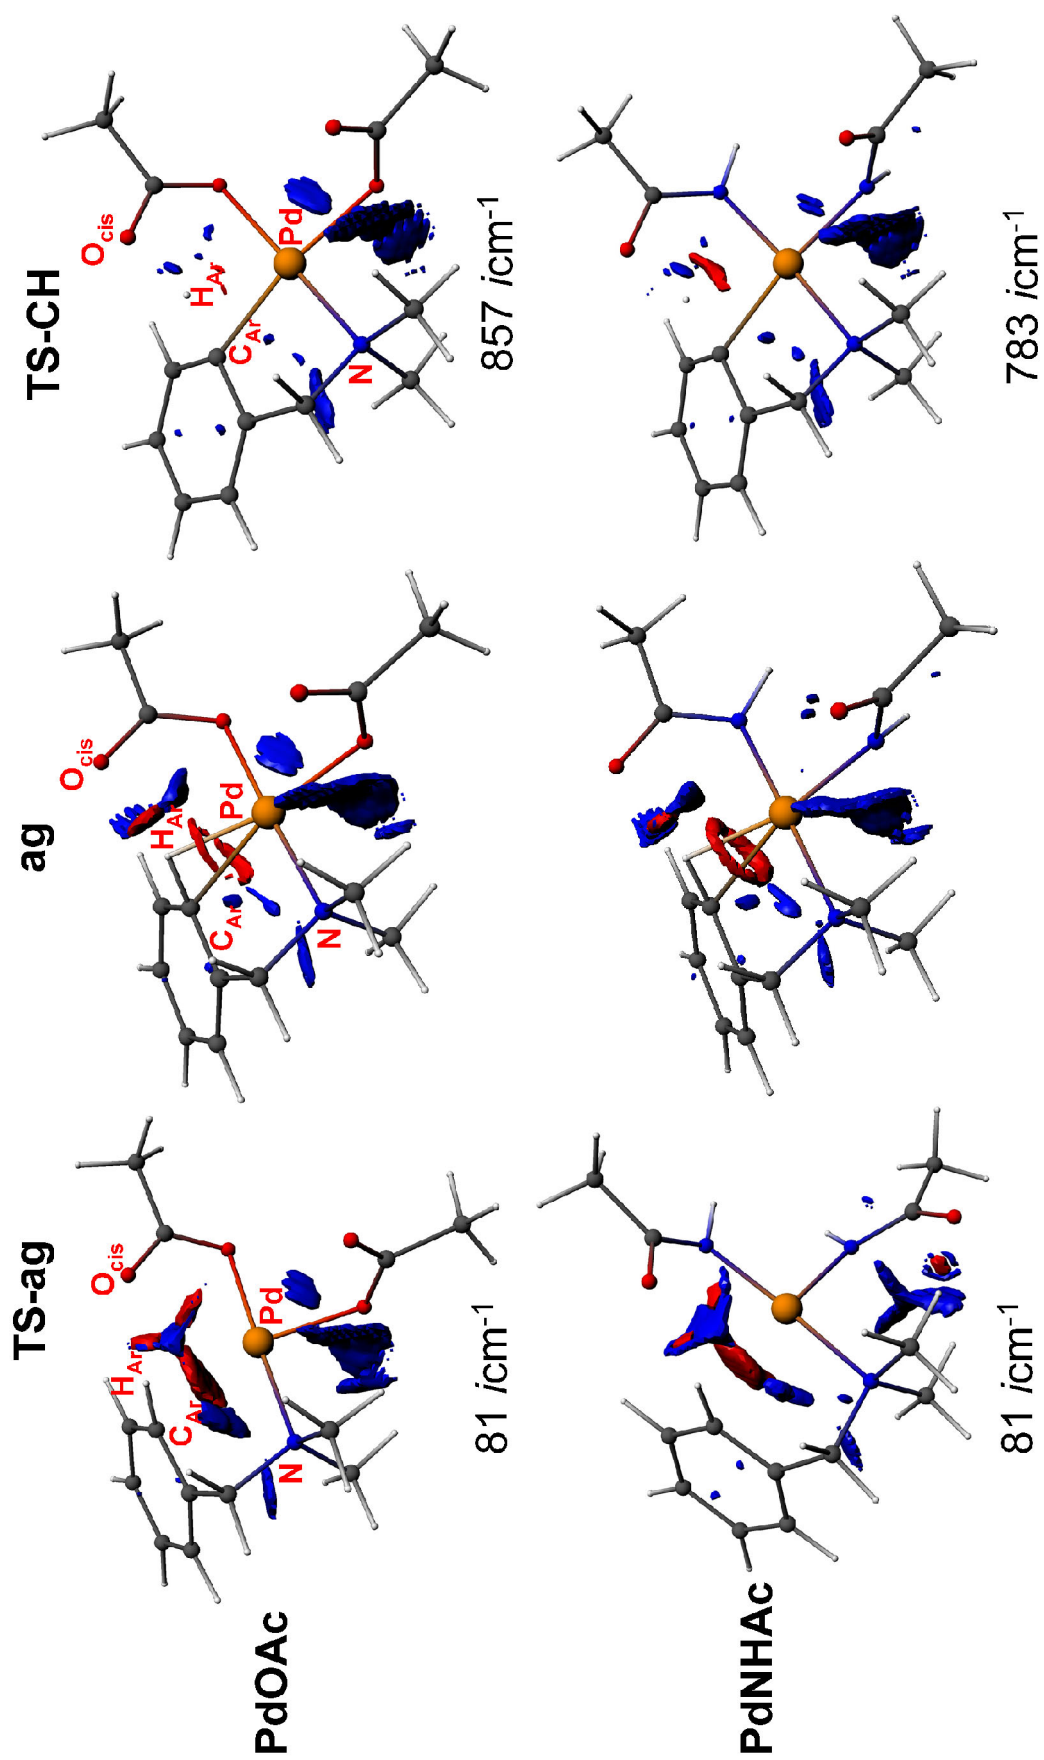

Figure S 5

High resolution Figure 2b

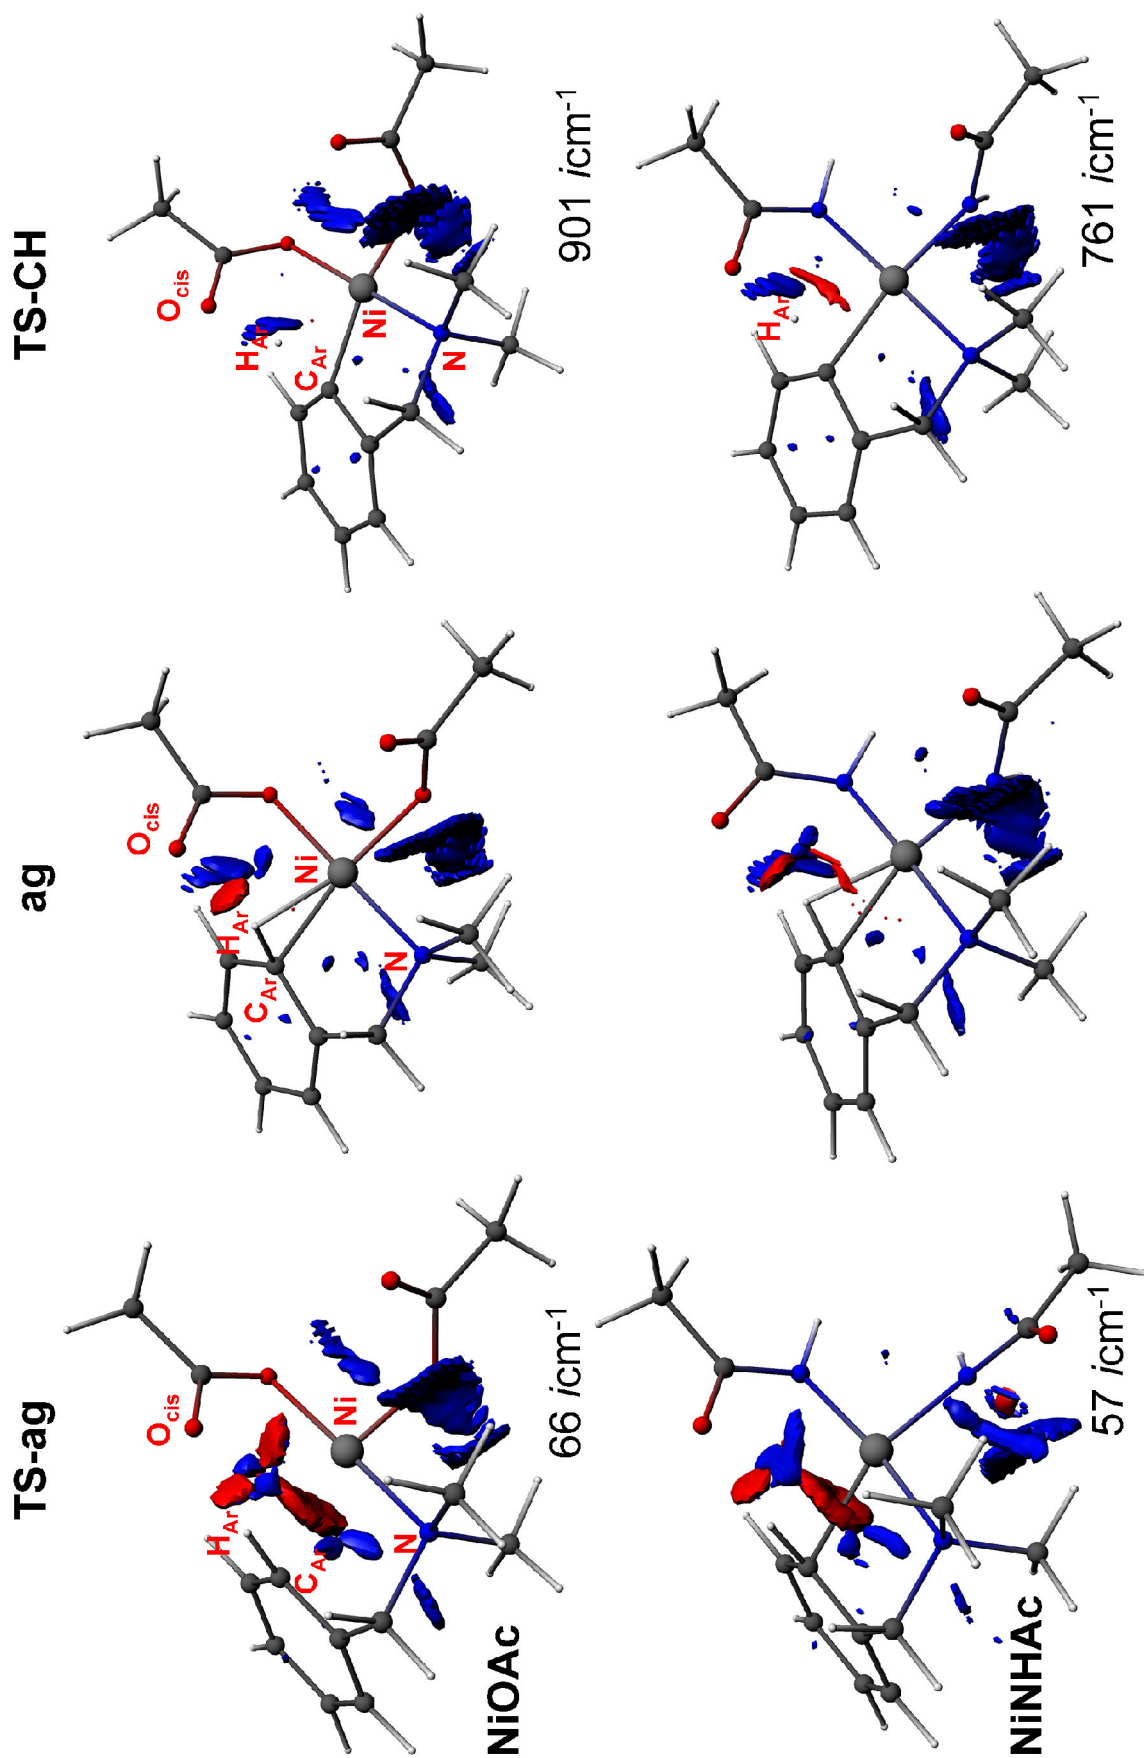

Figure S 6

Alternative representation of the IQA analysis of interactions within the metal-C<sub>Ar</sub>-H<sub>Ar</sub>-O<sub>cis</sub> site.

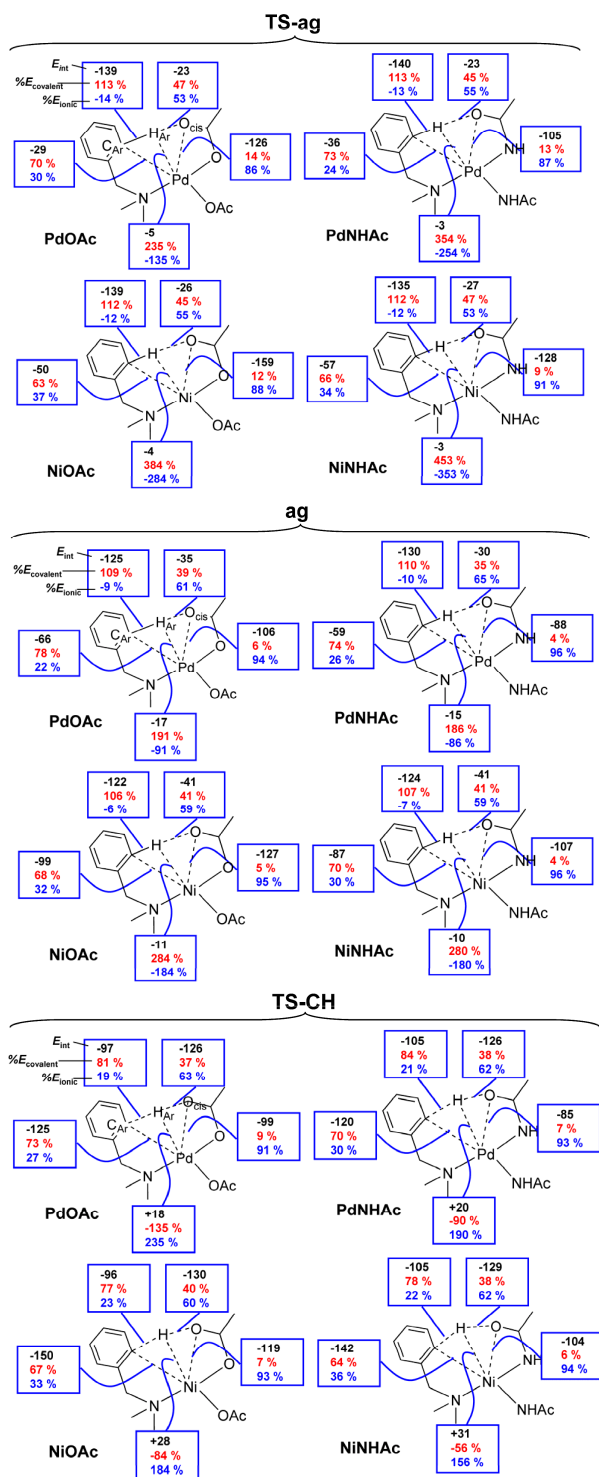

**Figure S 7** IQA analysis of TS-ag, ag and TS-CH in PdOAc, PdNHAc, NiOAc, NiNHAc systems. Atom-pair interaction energies within the reactive site (black coloured, in kcal/mol) are decomposed into their covalent component (red coloured % of  $E_{int}$ ) and ionic component (blue coloured % of  $E_{int}$ ).

## Energies of singlet state gas phase stationary geometries at the ZORA-PBE-D3(BJ)/all electron TZP level.

(geometries are provided in a separate .xyz file)

### AcOH

```
Zero-Point Energy :      0.059549 a.u.  
=====                1.620405 eV  
  
                                hartree          eV          kcal/mol          kJ/mol  
-----  
Bond Energy:                -1.712970779580363          -46.6123          -1074.91          -4497.40  
Zero-Point Energy:          0.059548779393052           1.6204           37.37           156.35  
Enthalpy (T=0K):           -1.653422000187311          -44.9919          -1037.54          -4341.06
```

### dmba

Summary of Bonding Energy (energy terms are taken from the energy decomposition above)

```
=====
```

|                                 |                                             |           |          |           |         |
|---------------------------------|---------------------------------------------|-----------|----------|-----------|---------|
| Electrostatic Energy:           | -3.687517122532499                          | -100.3424 | -2313.95 | -9681.57  |         |
| Kinetic Energy:                 | 4.593307094356874                           | 124.9902  | 2882.34  | 12059.73  |         |
| Coulomb (Steric+OrbInt) Energy: | -1.391224100561161                          | -37.8571  | -873.01  | -3652.66  |         |
| XC Energy:                      | -4.523301729129166                          | -123.0853 | -2838.41 | -11875.93 |         |
| Dispersion Energy:              | -0.023755747828824                          | -0.6464   | -14.91   | -62.37    |         |
| Total Bonding Energy:           | -5.032491605694775                          | -136.9411 | -3157.94 | -13212.80 |         |
| Temp                            |                                             | Transl    | Rotat    | Vibrat    | Total   |
| ----                            |                                             | -----     | -----    | -----     | -----   |
| 298.15                          | Entropy (cal/mole-K):                       | 40.615    | 29.653   | 26.081    | 96.349  |
|                                 | Internal Energy (Kcal/mole):                | 0.889     | 0.889    | 127.154   | 128.931 |
|                                 | Constant Volume Heat Capacity (cal/mole-K): | 2.981     | 2.981    | 32.157    | 38.119  |



## PdOAc

### Pd<sub>3</sub>(OAc)<sub>6</sub>

Summary of Bonding Energy (energy terms are taken from the energy decomposition above)

|                                 |                                             |           |          |           |         |
|---------------------------------|---------------------------------------------|-----------|----------|-----------|---------|
| Electrostatic Energy:           | -7.829931262678882                          | -213.0633 | -4913.36 | -20557.48 |         |
| Kinetic Energy:                 | 9.046314643038102                           | 246.1627  | 5676.65  | 23751.10  |         |
| Coulomb (Steric+OrbInt) Energy: | -2.642326876032584                          | -71.9014  | -1658.09 | -6937.43  |         |
| XC Energy:                      | -8.331532061611254                          | -226.7125 | -5228.12 | -21874.43 |         |
| Dispersion Energy:              | -0.061969579065108                          | -1.6863   | -38.89   | -162.70   |         |
| Total Bonding Energy:           | -9.819445136349726                          | -267.2007 | -6161.80 | -25780.95 |         |
| Temp                            | ----                                        | Transl    | Rotat    | Vibrat    | Total   |
| 298.15                          | Entropy (cal/mole-K):                       | 45.396    | 36.099   | 132.671   | 214.167 |
|                                 | Internal Energy (Kcal/mole):                | 0.889     | 0.889    | 209.809   | 211.586 |
|                                 | Constant Volume Heat Capacity (cal/mole-K): | 2.981     | 2.981    | 107.887   | 113.848 |

Summary of energy terms

|                    | hartree            | eV        | kcal/mol | kJ/mol    |
|--------------------|--------------------|-----------|----------|-----------|
| Bond Energy:       | -9.819445136349719 | -267.2007 | -6161.80 | -25780.95 |
| Internal Energy:   | 0.337184227000539  | 9.1752    | 211.59   | 885.28    |
| pV/n = RT:         | 0.000944186013486  | 0.0257    | 0.59     | 2.48      |
| Enthalpy H:        | -9.481316723335693 | -257.9998 | -5949.62 | -24893.19 |
| -T*S:              | -0.101757423420945 | -2.7690   | -63.85   | -267.16   |
| Gibbs free energy: | -9.583074146756639 | -260.7687 | -6013.47 | -25160.36 |

## anag

Summary of Bonding Energy (energy terms are taken from the energy decomposition above)

|                                 |                                             |           |          |           |         |
|---------------------------------|---------------------------------------------|-----------|----------|-----------|---------|
| Electrostatic Energy:           | -6.277192885419339                          | -170.8111 | -3939.00 | -16480.77 |         |
| Kinetic Energy:                 | 7.661708004022671                           | 208.4857  | 4807.79  | 20115.81  |         |
| Coulomb (Steric+OrbInt) Energy: | -2.334830242184601                          | -63.5340  | -1465.13 | -6130.10  |         |
| XC Energy:                      | -7.307079445588840                          | -198.8357 | -4585.26 | -19184.73 |         |
| Dispersion Energy:              | -0.048303068193589                          | -1.3144   | -30.31   | -126.82   |         |
| Total Bonding Energy:           | -8.305697637363698                          | -226.0095 | -5211.90 | -21806.61 |         |
| Temp                            | ----                                        | Transl    | Rotat    | Vibrat    | Total   |
| 298.15                          | Entropy (cal/mole-K):                       | 43.528    | 34.118   | 83.499    | 161.145 |
|                                 | Internal Energy (Kcal/mole):                | 0.889     | 0.889    | 199.297   | 201.075 |
|                                 | Constant Volume Heat Capacity (cal/mole-K): | 2.981     | 2.981    | 73.529    | 79.490  |

Summary of energy terms

|                    | hartree            | eV        | kcal/mol | kJ/mol    |
|--------------------|--------------------|-----------|----------|-----------|
| Bond Energy:       | -8.305697637363695 | -226.0095 | -5211.90 | -21806.61 |
| Internal Energy:   | 0.320432718913656  | 8.7194    | 201.07   | 841.30    |
| pV/n = RT:         | 0.000944186013486  | 0.0257    | 0.59     | 2.48      |
| Enthalpy H:        | -7.984320732436553 | -217.2644 | -5010.24 | -20962.83 |
| -T*S:              | -0.076565296680278 | -2.0834   | -48.05   | -201.02   |
| Gibbs free energy: | -8.060886029116832 | -219.3479 | -5058.28 | -21163.85 |

## TS-ag

Summary of Bonding Energy (energy terms are taken from the energy decomposition above)

|                                 |                                             |           |          |           |         |
|---------------------------------|---------------------------------------------|-----------|----------|-----------|---------|
| Electrostatic Energy:           | -6.277595158076167                          | -170.8221 | -3939.25 | -16481.82 |         |
| Kinetic Energy:                 | 7.724095781838685                           | 210.1833  | 4846.94  | 20279.61  |         |
| Coulomb (Steric+OrbInt) Energy: | -2.369454828711874                          | -64.4761  | -1486.86 | -6221.00  |         |
| XC Energy:                      | -7.311909791863723                          | -198.9672 | -4588.29 | -19197.42 |         |
| Dispersion Energy:              | -0.049950523980705                          | -1.3592   | -31.34   | -131.15   |         |
| Total Bonding Energy:           | -8.284814520793784                          | -225.4413 | -5198.80 | -21751.78 |         |
| Temp                            | ----                                        | Transl    | Rotat    | Vibrat    | Total   |
| 298.15                          | Entropy (cal/mole-K):                       | 43.528    | 33.875   | 80.112    | 157.515 |
|                                 | Internal Energy (Kcal/mole):                | 0.889     | 0.889    | 198.150   | 199.928 |
|                                 | Constant Volume Heat Capacity (cal/mole-K): | 2.981     | 2.981    | 71.923    | 77.884  |

## ag

Summary of Bonding Energy (energy terms are taken from the energy decomposition above)

|                                 |                    |           |          |           |
|---------------------------------|--------------------|-----------|----------|-----------|
| Electrostatic Energy:           | -6.331270600390512 | -172.2826 | -3972.93 | -16622.75 |
| Kinetic Energy:                 | 7.587056690252467  | 206.4543  | 4760.95  | 19919.81  |
| Coulomb (Steric+OrbInt) Energy: | -2.193462106942192 | -59.6871  | -1376.42 | -5758.93  |
| XC Energy:                      | -7.300580556189348 | -198.6589 | -4581.18 | -19167.67 |
| Dispersion Energy:              | -0.049776769051990 | -1.3545   | -31.24   | -130.69   |
| Total Bonding Energy:           | -8.288033342321576 | -225.5289 | -5200.82 | -21760.23 |

| Temp                    |                                             | Transl             | Rotat     | Vibrat   | Total     |
|-------------------------|---------------------------------------------|--------------------|-----------|----------|-----------|
| ----                    |                                             | -----              | -----     | -----    | -----     |
| 298.15                  | Entropy (cal/mole-K):                       | 43.528             | 33.823    | 78.052   | 155.403   |
|                         | Internal Energy (Kcal/mole):                | 0.889              | 0.889     | 197.427  | 199.205   |
|                         | Constant Volume Heat Capacity (cal/mole-K): | 2.981              | 2.981     | 71.801   | 77.763    |
| Summary of energy terms |                                             |                    |           |          |           |
|                         |                                             | hartree            | eV        | kcal/mol | kJ/mol    |
|                         |                                             | -----              | -----     | -----    | -----     |
|                         | Bond Energy:                                | -8.288033342321580 | -225.5289 | -5200.82 | -21760.23 |
|                         | Internal Energy:                            | 0.317452654640196  | 8.6383    | 199.20   | 833.47    |
|                         | pV/n = RT:                                  | 0.000944186013486  | 0.0257    | 0.59     | 2.48      |
|                         | Enthalpy H:                                 | -7.969636501667898 | -216.8648 | -5001.02 | -20924.28 |
|                         | -T*S:                                       | -0.073836781524833 | -2.0092   | -46.33   | -193.86   |
|                         | Gibbs free energy:                          | -8.043473283192730 | -218.8740 | -5047.36 | -21118.14 |

## TS-CH

Summary of Bonding Energy (energy terms are taken from the energy decomposition above)

|                                 |                    |           |          |           |
|---------------------------------|--------------------|-----------|----------|-----------|
| Electrostatic Energy:           | -6.382906191972904 | -173.6877 | -4005.33 | -16758.32 |
| Kinetic Energy:                 | 7.680656910708635  | 209.0013  | 4819.69  | 20165.56  |
| Coulomb (Steric+OrbInt) Energy: | -2.226531708004380 | -60.5870  | -1397.17 | -5845.76  |
| XC Energy:                      | -7.305259706776233 | -198.7862 | -4584.12 | -19179.96 |
| Dispersion Energy:              | -0.050406949556714 | -1.3716   | -31.63   | -132.34   |
| Total Bonding Energy:           | -8.284447645601597 | -225.4313 | -5198.57 | -21750.81 |

| Temp   |                                             | Transl | Rotat  | Vibrat  | Total   |
|--------|---------------------------------------------|--------|--------|---------|---------|
| ----   |                                             | -----  | -----  | -----   | -----   |
| 298.15 | Entropy (cal/mole-K):                       | 43.528 | 33.743 | 78.467  | 155.738 |
|        | Internal Energy (Kcal/mole):                | 0.889  | 0.889  | 195.483 | 197.261 |
|        | Constant Volume Heat Capacity (cal/mole-K): | 2.981  | 2.981  | 72.619  | 78.581  |

## McH\*

Summary of Bonding Energy (energy terms are taken from the energy decomposition above)

|                                 |                    |           |          |           |
|---------------------------------|--------------------|-----------|----------|-----------|
| Electrostatic Energy:           | -6.388562420344123 | -173.8416 | -4008.88 | -16773.17 |
| Kinetic Energy:                 | 7.616292897134159  | 207.2499  | 4779.30  | 19996.57  |
| Coulomb (Steric+OrbInt) Energy: | -2.174914748379308 | -59.1824  | -1364.78 | -5710.24  |
| XC Energy:                      | -7.327601691817688 | -199.3942 | -4598.14 | -19238.62 |
| Dispersion Energy:              | -0.049182749194828 | -1.3383   | -30.86   | -129.13   |
| Total Bonding Energy:           | -8.323968712601788 | -226.5067 | -5223.37 | -21854.58 |

| Temp   |                                             | Transl | Rotat  | Vibrat  | Total   |
|--------|---------------------------------------------|--------|--------|---------|---------|
| ----   |                                             | -----  | -----  | -----   | -----   |
| 298.15 | Entropy (cal/mole-K):                       | 43.528 | 33.911 | 74.927  | 152.366 |
|        | Internal Energy (Kcal/mole):                | 0.889  | 0.889  | 197.382 | 199.160 |
|        | Constant Volume Heat Capacity (cal/mole-K): | 2.981  | 2.981  | 70.695  | 76.656  |

|                    | hartree            | eV        | kcal/mol | kJ/mol    |
|--------------------|--------------------|-----------|----------|-----------|
|                    | -----              | -----     | -----    | -----     |
| Bond Energy:       | -8.323968712601788 | -226.5067 | -5223.37 | -21854.58 |
| Internal Energy:   | 0.317380833114742  | 8.6364    | 199.16   | 833.28    |
| pV/n = RT:         | 0.000944186013486  | 0.0257    | 0.59     | 2.48      |
| Enthalpy H:        | -8.005643693473560 | -217.8446 | -5023.62 | -21018.81 |
| -T*S:              | -0.072394096909469 | -1.9699   | -45.43   | -190.07   |
| Gibbs free energy: | -8.078037790383030 | -219.8146 | -5069.05 | -21208.89 |

## Mc

Summary of Bonding Energy (energy terms are taken from the energy decomposition above)

|                                 |                    |           |          |           |
|---------------------------------|--------------------|-----------|----------|-----------|
| Electrostatic Energy:           | -5.083513764049076 | -138.3294 | -3189.95 | -13346.76 |
| Kinetic Energy:                 | 6.083550300150179  | 165.5418  | 3817.49  | 15972.36  |
| Coulomb (Steric+OrbInt) Energy: | -1.778149771835714 | -48.3859  | -1115.81 | -4668.53  |
| XC Energy:                      | -5.766902538037130 | -156.9254 | -3618.79 | -15141.00 |
| Dispersion Energy:              | -0.037743163342784 | -1.0270   | -23.68   | -99.09    |
| Total Bonding Energy:           | -6.582758937114527 | -179.1260 | -4130.74 | -17283.03 |

| Temp   |                                             | Transl | Rotat  | Vibrat  | Total   |
|--------|---------------------------------------------|--------|--------|---------|---------|
| ----   |                                             | -----  | -----  | -----   | -----   |
| 298.15 | Entropy (cal/mole-K):                       | 42.983 | 32.613 | 54.057  | 129.653 |
|        | Internal Energy (Kcal/mole):                | 0.889  | 0.889  | 157.013 | 158.790 |
|        | Constant Volume Heat Capacity (cal/mole-K): | 2.981  | 2.981  | 54.155  | 60.117  |

|                    | hartree            | eV        | kcal/mol | kJ/mol    |
|--------------------|--------------------|-----------|----------|-----------|
|                    | -----              | -----     | -----    | -----     |
| Bond Energy:       | -6.582758937114536 | -179.1260 | -4130.74 | -17283.03 |
| Internal Energy:   | 0.253048186207515  | 6.8858    | 158.79   | 664.38    |
| pV/n = RT:         | 0.000944186013486  | 0.0257    | 0.59     | 2.48      |
| Enthalpy H:        | -6.328766564893535 | -172.2145 | -3971.36 | -16616.17 |
| -T*S:              | -0.061602090951446 | -1.6763   | -38.66   | -161.74   |
| Gibbs free energy: | -6.390368655844981 | -173.8908 | -4010.02 | -16777.91 |

## PdNHAc

### anag

Summary of Bonding Energy (energy terms are taken from the energy decomposition above)

|                                 |                                             |           |          |           |         |
|---------------------------------|---------------------------------------------|-----------|----------|-----------|---------|
| Electrostatic Energy:           | -6.520971352314273                          | -177.4447 | -4091.97 | -17120.81 |         |
| Kinetic Energy:                 | 8.050688894468166                           | 219.0704  | 5051.88  | 21137.08  |         |
| Coulomb (Steric+OrbInt) Energy: | -2.503818346424367                          | -68.1324  | -1571.17 | -6573.77  |         |
| XC Energy:                      | -7.655470744385613                          | -208.3160 | -4803.88 | -20099.44 |         |
| Dispersion Energy:              | -0.052023711963606                          | -1.4156   | -32.65   | -136.59   |         |
| Total Bonding Energy:           | -8.681595260619693                          | -236.2382 | -5447.78 | -22793.53 |         |
| Temp                            |                                             | Transl    | Rotat    | Vibrat    | Total   |
| ----                            |                                             | -----     | -----    | -----     | -----   |
| 298.15                          | Entropy (cal/mole-K):                       | 43.512    | 34.138   | 80.899    | 158.549 |
|                                 | Internal Energy (Kcal/mole):                | 0.889     | 0.889    | 214.379   | 216.156 |
|                                 | Constant Volume Heat Capacity (cal/mole-K): | 2.981     | 2.981    | 76.276    | 82.237  |

#### Summary of energy terms

|                    | hartree            | eV        | kcal/mol | kJ/mol    |
|--------------------|--------------------|-----------|----------|-----------|
| Bond Energy:       | -8.681595260619687 | -236.2382 | -5447.78 | -22793.53 |
| Internal Energy:   | 0.344466431106843  | 9.3734    | 216.16   | 904.40    |
| pV/n = RT:         | 0.000944186013486  | 0.0257    | 0.59     | 2.48      |
| Enthalpy H:        | -8.336184643499358 | -226.8391 | -5231.04 | -21886.65 |
| -T*S:              | -0.075331600896460 | -2.0499   | -47.27   | -197.78   |
| Gibbs free energy: | -8.411516244395818 | -228.8890 | -5278.31 | -22084.43 |

### TS-ag

Summary of Bonding Energy (energy terms are taken from the energy decomposition above)

|                                 |                                             |           |          |           |         |
|---------------------------------|---------------------------------------------|-----------|----------|-----------|---------|
| Electrostatic Energy:           | -6.531467116000415                          | -177.7303 | -4098.56 | -17148.36 |         |
| Kinetic Energy:                 | 8.131001208299523                           | 221.2558  | 5102.28  | 21347.94  |         |
| Coulomb (Steric+OrbInt) Energy: | -2.541814647453464                          | -69.1663  | -1595.01 | -6673.53  |         |
| XC Energy:                      | -7.667895103101756                          | -208.6540 | -4811.68 | -20132.06 |         |
| Dispersion Energy:              | -0.053769637302794                          | -1.4631   | -33.74   | -141.17   |         |
| Total Bonding Energy:           | -8.663945295558907                          | -235.7579 | -5436.71 | -22747.19 |         |
| Temp                            |                                             | Transl    | Rotat    | Vibrat    | Total   |
| ----                            |                                             | -----     | -----    | -----     | -----   |
| 298.15                          | Entropy (cal/mole-K):                       | 43.512    | 33.956   | 80.239    | 157.708 |
|                                 | Internal Energy (Kcal/mole):                | 0.889     | 0.889    | 213.331   | 215.108 |
|                                 | Constant Volume Heat Capacity (cal/mole-K): | 2.981     | 2.981    | 74.668    | 80.629  |

#### Summary of energy terms

|                    | hartree            | eV        | kcal/mol | kJ/mol    |
|--------------------|--------------------|-----------|----------|-----------|
| Bond Energy:       | -8.663945295558912 | -235.7579 | -5436.71 | -22747.19 |
| Internal Energy:   | 0.342796486560694  | 9.3280    | 215.11   | 900.01    |
| pV/n = RT:         | 0.000944186013486  | 0.0257    | 0.59     | 2.48      |
| Enthalpy H:        | -8.320204622984733 | -226.4043 | -5221.01 | -21844.69 |
| -T*S:              | -0.074931958373709 | -2.0390   | -47.02   | -196.73   |
| Gibbs free energy: | -8.395136581358441 | -228.4433 | -5268.03 | -22041.43 |

### ag

Summary of Bonding Energy (energy terms are taken from the energy decomposition above)

|                                 |                                             |           |          |           |         |
|---------------------------------|---------------------------------------------|-----------|----------|-----------|---------|
| Electrostatic Energy:           | -6.560755743478440                          | -178.5272 | -4116.94 | -17225.26 |         |
| Kinetic Energy:                 | 7.981266074847014                           | 217.1813  | 5008.32  | 20954.81  |         |
| Coulomb (Steric+OrbInt) Energy: | -2.388778262851467                          | -65.0020  | -1498.98 | -6271.74  |         |
| XC Energy:                      | -7.645874041401966                          | -208.0548 | -4797.86 | -20074.24 |         |
| Dispersion Energy:              | -0.053277465429569                          | -1.4498   | -33.43   | -139.88   |         |
| Total Bonding Energy:           | -8.667419438314429                          | -235.8525 | -5438.89 | -22756.31 |         |
| Temp                            |                                             | Transl    | Rotat    | Vibrat    | Total   |
| ----                            |                                             | -----     | -----    | -----     | -----   |
| 298.15                          | Entropy (cal/mole-K):                       | 43.512    | 33.962   | 77.590    | 155.064 |
|                                 | Internal Energy (Kcal/mole):                | 0.889     | 0.889    | 212.783   | 214.560 |
|                                 | Constant Volume Heat Capacity (cal/mole-K): | 2.981     | 2.981    | 74.480    | 80.442  |

Contributions from frequencies below 20 1/cm

|                                             |        |
|---------------------------------------------|--------|
| Frequency (1/cm):                           | 15.333 |
| Entropy (cal/mole-K):                       | 7.162  |
| Internal Energy (Kcal/mole):                | 0.593  |
| Constant Volume Heat Capacity (cal/mole-K): | 1.986  |

#### Summary of energy terms

|                    | hartree            | eV        | kcal/mol | kJ/mol    |
|--------------------|--------------------|-----------|----------|-----------|
| Bond Energy:       | -8.667419438314425 | -235.8525 | -5438.89 | -22756.31 |
| Internal Energy:   | 0.341923281840152  | 9.3042    | 214.56   | 897.72    |
| pV/n = RT:         | 0.000944186013486  | 0.0257    | 0.59     | 2.48      |
| Enthalpy H:        | -8.324551970460789 | -226.5226 | -5223.74 | -21856.11 |
| -T*S:              | -0.073675867214901 | -2.0048   | -46.23   | -193.44   |
| Gibbs free energy: | -8.398227837675691 | -228.5274 | -5269.97 | -22049.54 |

### TS-CH

Summary of Bonding Energy (energy terms are taken from the energy decomposition above)

|                                 |                                             |                    |                |              |           |
|---------------------------------|---------------------------------------------|--------------------|----------------|--------------|-----------|
| Electrostatic Energy:           | -6.618126174891654                          | -180.0884          | -4152.94       | -17375.89    |           |
| Kinetic Energy:                 | 8.238046296249976                           | 224.1686           | 5169.45        | 21628.99     |           |
| Coulomb (Steric+OrbInt) Energy: | -2.552111124334914                          | -69.4465           | -1601.47       | -6700.57     |           |
| XC Energy:                      | -7.673893174966073                          | -208.8173          | -4815.44       | -20147.80    |           |
| Dispersion Energy:              | -0.054067905688602                          | -1.4713            | -33.93         | -141.96      |           |
| Total Bonding Energy:           | -8.660152083631267                          | -235.6547          | -5434.33       | -22737.23    |           |
| Temp                            |                                             | Transl             | Rotat          | Vibrat       |           |
| -----                           |                                             | -----              | -----          | -----        |           |
| 298.15                          | Entropy (cal/mole-K):                       | 43.512             | 33.838         | 77.469       | 154.819   |
|                                 | Internal Energy (Kcal/mole):                | 0.889              | 0.889          | 210.874      | 212.652   |
|                                 | Constant Volume Heat Capacity (cal/mole-K): | 2.981              | 2.981          | 75.048       | 81.010    |
|                                 | Summary of energy terms                     |                    |                |              |           |
|                                 | ----- hartree                               | ----- eV           | ----- kcal/mol | ----- kJ/mol |           |
|                                 | Bond Energy:                                | -8.660152083631262 | -235.6547      | -5434.33     | -22737.23 |
|                                 | Internal Energy:                            | 0.338881708909250  | 9.2214         | 212.65       | 889.73    |
|                                 | pV/n = RT:                                  | 0.000944186013486  | 0.0257         | 0.59         | 2.48      |
|                                 | Enthalpy H:                                 | -8.320326188708526 | -226.4076      | -5221.08     | -21845.01 |
|                                 | -T*S:                                       | -0.073559669554342 | -2.0017        | -46.16       | -193.13   |
|                                 | Gibbs free energy:                          | -8.393885858262868 | -228.4093      | -5267.24     | -22038.14 |

## McH

Summary of Bonding Energy (energy terms are taken from the energy decomposition above)

|                                 |                                              |                    |                |              |           |
|---------------------------------|----------------------------------------------|--------------------|----------------|--------------|-----------|
| Electrostatic Energy:           | -6.593264225754165                           | -179.4118          | -4137.34       | -17310.61    |           |
| Kinetic Energy:                 | 8.024551055543853                            | 218.3591           | 5035.48        | 21068.46     |           |
| Coulomb (Steric+OrbInt) Energy: | -2.416159070255141                           | -65.7470           | -1516.16       | -6343.62     |           |
| XC Energy:                      | -7.642449891988647                           | -207.9616          | -4795.71       | -20065.25    |           |
| Dispersion Energy:              | -0.053740196616966                           | -1.4623            | -33.72         | -141.09      |           |
| Total Bonding Energy:           | -8.681062329071066                           | -236.2237          | -5447.45       | -22792.13    |           |
| Temp                            |                                              | Transl             | Rotat          | Vibrat       |           |
| -----                           |                                              | -----              | -----          | -----        |           |
| 298.15                          | Entropy (cal/mole-K):                        | 43.512             | 33.898         | 72.349       | 149.759   |
|                                 | Internal Energy (Kcal/mole):                 | 0.889              | 0.889          | 213.760      | 215.537   |
|                                 | Constant Volume Heat Capacity (cal/mole-K):  | 2.981              | 2.981          | 73.962       | 79.923    |
|                                 | Contributions from frequencies below 20 1/cm |                    |                |              |           |
|                                 | Frequency (1/cm):                            | 11.953             |                |              |           |
|                                 | Entropy (cal/mole-K):                        | 7.657              |                |              |           |
|                                 | Internal Energy (Kcal/mole):                 | 0.593              |                |              |           |
|                                 | Constant Volume Heat Capacity (cal/mole-K):  | 1.987              |                |              |           |
|                                 | Summary of energy terms                      |                    |                |              |           |
|                                 | ----- hartree                                | ----- eV           | ----- kcal/mol | ----- kJ/mol |           |
|                                 | Bond Energy:                                 | -8.681062329071059 | -236.2237      | -5447.45     | -22792.13 |
|                                 | Internal Energy:                             | 0.343480251279986  | 9.3466         | 215.54       | 901.81    |
|                                 | pV/n = RT:                                   | 0.000944186013486  | 0.0257         | 0.59         | 2.48      |
|                                 | Enthalpy H:                                  | -8.336637891777587 | -226.8515      | -5231.32     | -21887.84 |
|                                 | -T*S:                                        | -0.071155421631201 | -1.9362        | -44.65       | -186.82   |
|                                 | Gibbs free energy:                           | -8.407793313408789 | -228.7877      | -5275.97     | -22074.66 |

## Mc

Summary of Bonding Energy (energy terms are taken from the energy decomposition above)

|                                 |                                             |                    |                |              |           |
|---------------------------------|---------------------------------------------|--------------------|----------------|--------------|-----------|
| Electrostatic Energy:           | -5.185824074811112                          | -141.1135          | -3254.15       | -13615.38    |           |
| Kinetic Energy:                 | 6.257678811354737                           | 170.2801           | 3926.75        | 16429.53     |           |
| Coulomb (Steric+OrbInt) Energy: | -1.864593368876115                          | -50.7382           | -1170.05       | -4895.49     |           |
| XC Energy:                      | -5.928669015151945                          | -161.3273          | -3720.30       | -15565.72    |           |
| Dispersion Energy:              | -0.039315009010130                          | -1.0698            | -24.67         | -103.22      |           |
| Total Bonding Energy:           | -6.760722656494566                          | -183.9686          | -4242.42       | -17750.27    |           |
| Temp                            |                                             | Transl             | Rotat          | Vibrat       |           |
| -----                           |                                             | -----              | -----          | -----        |           |
| 298.15                          | Entropy (cal/mole-K):                       | 42.973             | 32.627         | 51.819       | 127.419   |
|                                 | Internal Energy (Kcal/mole):                | 0.889              | 0.889          | 164.473      | 166.250   |
|                                 | Constant Volume Heat Capacity (cal/mole-K): | 2.981              | 2.981          | 55.564       | 61.526    |
|                                 | Summary of energy terms                     |                    |                |              |           |
|                                 | ----- hartree                               | ----- eV           | ----- kcal/mol | ----- kJ/mol |           |
|                                 | Bond Energy:                                | -6.760722656494560 | -183.9686      | -4242.42     | -17750.27 |
|                                 | Internal Energy:                            | 0.264936718771427  | 7.2093         | 166.25       | 695.59    |
|                                 | pV/n = RT:                                  | 0.000944186013486  | 0.0257         | 0.59         | 2.48      |
|                                 | Enthalpy H:                                 | -6.494841751709648 | -176.7336      | -4075.58     | -17052.20 |
|                                 | -T*S:                                       | -0.060540795083453 | -1.6474        | -37.99       | -158.95   |
|                                 | Gibbs free energy:                          | -6.555382546793100 | -178.3810      | -4113.57     | -17211.15 |

## Acetamide-NH

Summary of Bonding Energy (energy terms are taken from the energy decomposition above)

|                                 |                    |          |          |          |
|---------------------------------|--------------------|----------|----------|----------|
| Electrostatic Energy:           | -1.325957969766210 | -36.0812 | -832.05  | -3481.30 |
| Kinetic Energy:                 | 1.719857336898261  | 46.7997  | 1079.23  | 4515.48  |
| Coulomb (Steric+OrbInt) Energy: | -0.591562985817802 | -16.0972 | -371.21  | -1553.15 |
| XC Energy:                      | -1.686645063466067 | -45.8959 | -1058.39 | -4428.29 |

|                         |                                             |          |          |          |        |
|-------------------------|---------------------------------------------|----------|----------|----------|--------|
| Dispersion Energy:      | -0.005178291489592                          | -0.1409  | -3.25    | -13.60   |        |
| Total Bonding Energy:   | -1.889486973641410                          | -51.4156 | -1185.67 | -4960.85 |        |
| Temp                    |                                             | Transl   | Rotat    | Vibrat   |        |
| ----                    |                                             | -----    | -----    | -----    |        |
| 298.15                  | Entropy (cal/mole-K):                       | 38.147   | 23.965   | 6.994    | 69.106 |
|                         | Internal Energy (Kcal/mole):                | 0.889    | 0.889    | 46.203   | 47.980 |
|                         | Constant Volume Heat Capacity (cal/mole-K): | 2.981    | 2.981    | 9.810    | 15.772 |
| Summary of energy terms |                                             |          |          |          |        |
|                         | hartree                                     | eV       | kcal/mol | kJ/mol   |        |
|                         | -----                                       | -----    | -----    | -----    |        |
| Bond Energy:            | -1.889486973641410                          | -51.4156 | -1185.67 | -4960.85 |        |
| Internal Energy:        | 0.076461189304234                           | 2.0806   | 47.98    | 200.75   |        |
| pV/n = RT:              | 0.000944186013486                           | 0.0257   | 0.59     | 2.48     |        |
| Enthalpy H:             | -1.812081598323691                          | -49.3092 | -1137.10 | -4757.62 |        |
| -T*S:                   | -0.032834456964317                          | -0.8935  | -20.60   | -86.21   |        |
| Gibbs free energy:      | -1.844916055288008                          | -50.2027 | -1157.70 | -4843.83 |        |

## Acetamide-NH<sub>2</sub>

Summary of Bonding Energy (energy terms are taken from the energy decomposition above)

|                                 |                                             |          |          |          |        |
|---------------------------------|---------------------------------------------|----------|----------|----------|--------|
| Electrostatic Energy:           | -1.333919594163826                          | -36.2978 | -837.05  | -3502.21 |        |
| Kinetic Energy:                 | 1.729179097246252                           | 47.0534  | 1085.08  | 4539.96  |        |
| Coulomb (Steric+OrbInt) Energy: | -0.591998764992073                          | -16.1091 | -371.48  | -1554.29 |        |
| XC Energy:                      | -1.705928446853525                          | -46.4207 | -1070.49 | -4478.91 |        |
| Dispersion Energy:              | -0.005152232352841                          | -0.1402  | -3.23    | -13.53   |        |
| Total Bonding Energy:           | -1.907819941116013                          | -51.9144 | -1197.18 | -5008.98 |        |
| Temp                            |                                             | Transl   | Rotat    | Vibrat   |        |
| ----                            |                                             | -----    | -----    | -----    |        |
| 298.15                          | Entropy (cal/mole-K):                       | 38.147   | 23.977   | 11.269   | 73.393 |
|                                 | Internal Energy (Kcal/mole):                | 0.889    | 0.889    | 46.084   | 47.862 |
|                                 | Constant Volume Heat Capacity (cal/mole-K): | 2.981    | 2.981    | 11.028   | 16.990 |
| Summary of energy terms         |                                             |          |          |          |        |
|                                 | hartree                                     | eV       | kcal/mol | kJ/mol   |        |
|                                 | -----                                       | -----    | -----    | -----    |        |
| Bond Energy:                    | -1.907819941116013                          | -51.9144 | -1197.18 | -5008.98 |        |
| Internal Energy:                | 0.076272626869190                           | 2.0755   | 47.86    | 200.25   |        |
| pV/n = RT:                      | 0.000944186013486                           | 0.0257   | 0.59     | 2.48     |        |
| Enthalpy H:                     | -1.830603128233338                          | -49.8132 | -1148.72 | -4806.25 |        |
| -T*S:                           | -0.034871352494837                          | -0.9489  | -21.88   | -91.55   |        |
| Gibbs free energy:              | -1.865474480728174                          | -50.7621 | -1170.60 | -4897.80 |        |

## NiOAc

### anag

Summary of Bonding Energy (energy terms are taken from the energy decomposition above)

|                                 |                                             |           |          |           |         |
|---------------------------------|---------------------------------------------|-----------|----------|-----------|---------|
| Electrostatic Energy:           | -6.379923249796706                          | -173.6065 | -4003.46 | -16750.49 |         |
| Kinetic Energy:                 | 7.641249071927135                           | 207.9290  | 4794.96  | 20062.10  |         |
| Coulomb (Steric+OrbInt) Energy: | -2.123025944978075                          | -57.7705  | -1332.22 | -5574.00  |         |
| XC Energy:                      | -7.486466951518187                          | -203.7171 | -4697.83 | -19655.72 |         |
| Dispersion Energy:              | -0.046980198424488                          | -1.2784   | -29.48   | -123.35   |         |
| Total Bonding Energy:           | -8.395147272790322                          | -228.4436 | -5268.04 | -22041.46 |         |
| Temp                            |                                             | Transl    | Rotat    | Vibrat    | Total   |
| ----                            |                                             | -----     | -----    | -----     | -----   |
| 298.15                          | Entropy (cal/mole-K):                       | 43.101    | 33.855   | 81.711    | 158.667 |
|                                 | Internal Energy (Kcal/mole):                | 0.889     | 0.889    | 199.522   | 201.299 |
|                                 | Constant Volume Heat Capacity (cal/mole-K): | 2.981     | 2.981    | 72.955    | 78.917  |

### TS-ag

|        |                                             |        |        |         |         |
|--------|---------------------------------------------|--------|--------|---------|---------|
| Temp   |                                             | Transl | Rotat  | Vibrat  | Total   |
| ----   |                                             | -----  | -----  | -----   | -----   |
| 298.15 | Entropy (cal/mole-K):                       | 43.101 | 33.855 | 81.711  | 158.667 |
|        | Internal Energy (Kcal/mole):                | 0.889  | 0.889  | 199.522 | 201.299 |
|        | Constant Volume Heat Capacity (cal/mole-K): | 2.981  | 2.981  | 72.955  | 78.917  |
| Temp   |                                             | Transl | Rotat  | Vibrat  | Total   |
| ----   |                                             | -----  | -----  | -----   | -----   |
| 298.15 | Entropy (cal/mole-K):                       | 43.101 | 33.595 | 74.394  | 151.089 |
|        | Internal Energy (Kcal/mole):                | 0.889  | 0.889  | 198.722 | 200.500 |
|        | Constant Volume Heat Capacity (cal/mole-K): | 2.981  | 2.981  | 70.852  | 76.813  |

Summary of energy terms

|                    | hartree            | eV        | kcal/mol | kJ/mol    |
|--------------------|--------------------|-----------|----------|-----------|
| Bond Energy:       | -8.367709233633738 | -227.6970 | -5250.82 | -21969.42 |
| Internal Energy:   | 0.319516973639480  | 8.6945    | 200.50   | 838.89    |
| pV/n = RT:         | 0.000944186013486  | 0.0257    | 0.59     | 2.48      |
| Enthalpy H:        | -8.047248073980771 | -218.9768 | -5049.72 | -21128.05 |
| -T*S:              | -0.071787383281914 | -1.9534   | -45.05   | -188.48   |
| Gibbs free energy: | -8.119035457262687 | -220.9302 | -5094.77 | -21316.52 |

### ag

Summary of Bonding Energy (energy terms are taken from the energy decomposition above)

|                                 |                                             |           |          |           |         |
|---------------------------------|---------------------------------------------|-----------|----------|-----------|---------|
| Electrostatic Energy:           | -6.440677905918429                          | -175.2598 | -4041.59 | -16910.00 |         |
| Kinetic Energy:                 | 7.650530818315460                           | 208.1815  | 4800.78  | 20086.47  |         |
| Coulomb (Steric+OrbInt) Energy: | -2.052644259191659                          | -55.8553  | -1288.05 | -5389.22  |         |
| XC Energy:                      | -7.480655332921833                          | -203.5590 | -4694.18 | -19640.46 |         |
| Dispersion Energy:              | -0.048743803903237                          | -1.3264   | -30.59   | -127.98   |         |
| Total Bonding Energy:           | -8.372190483619699                          | -227.8189 | -5253.63 | -21981.18 |         |
| Temp                            |                                             | Transl    | Rotat    | Vibrat    | Total   |
| ----                            |                                             | -----     | -----    | -----     | -----   |
| 298.15                          | Entropy (cal/mole-K):                       | 43.101    | 33.566   | 72.823    | 149.490 |
|                                 | Internal Energy (Kcal/mole):                | 0.889     | 0.889    | 197.643   | 199.420 |
|                                 | Constant Volume Heat Capacity (cal/mole-K): | 2.981     | 2.981    | 71.014    | 76.976  |

Contributions from frequencies below 20 1/cm

|                                             |        |
|---------------------------------------------|--------|
| Frequency (1/cm):                           | 10.654 |
| Entropy (cal/mole-K):                       | 7.885  |
| Internal Energy (Kcal/mole):                | 0.593  |
| Constant Volume Heat Capacity (cal/mole-K): | 1.987  |

### TS-CH

Summary of Bonding Energy (energy terms are taken from the energy decomposition above)

|                                 |                    |           |          |           |
|---------------------------------|--------------------|-----------|----------|-----------|
| Electrostatic Energy:           | -6.483588440671703 | -176.4274 | -4068.51 | -17022.66 |
| Kinetic Energy:                 | 7.639575987009962  | 207.8834  | 4793.91  | 20057.70  |
| Coulomb (Steric+OrbInt) Energy: | -1.993489443694870 | -54.2456  | -1250.93 | -5233.91  |
| XC Energy:                      | -7.481836471545610 | -203.5911 | -4694.92 | -19643.56 |
| Dispersion Energy:              | -0.049278667483101 | -1.3409   | -30.92   | -129.38   |
| Total Bonding Energy:           | -8.368617036385320 | -227.7217 | -5251.39 | -21971.80 |

Summary of Bonding Energy (energy terms are taken from the energy decomposition above)

|                                 |                    |           |          |           |
|---------------------------------|--------------------|-----------|----------|-----------|
| Electrostatic Energy:           | -6.483588440671703 | -176.4274 | -4068.51 | -17022.66 |
| Kinetic Energy:                 | 7.639575987009962  | 207.8834  | 4793.91  | 20057.70  |
| Coulomb (Steric+OrbInt) Energy: | -1.993489443694870 | -54.2456  | -1250.93 | -5233.91  |

|                       |                    |           |          |           |
|-----------------------|--------------------|-----------|----------|-----------|
| XC Energy:            | -7.481836471545610 | -203.5911 | -4694.92 | -19643.56 |
| Dispersion Energy:    | -0.049278667483101 | -1.3409   | -30.92   | -129.38   |
| Total Bonding Energy: | -8.368617036385320 | -227.7217 | -5251.39 | -21971.80 |

## McH

Summary of Bonding Energy (energy terms are taken from the energy decomposition above)

|                                 |                                             |           |          |           |         |
|---------------------------------|---------------------------------------------|-----------|----------|-----------|---------|
| Electrostatic Energy:           | -6.463772015880339                          | -175.8882 | -4056.08 | -16970.63 |         |
| Kinetic Energy:                 | 7.569800650960104                           | 205.9848  | 4750.12  | 19874.51  |         |
| Coulomb (Steric+OrbInt) Energy: | -1.960626225415197                          | -53.3514  | -1230.31 | -5147.62  |         |
| XC Energy:                      | -7.478573015914366                          | -203.5023 | -4692.88 | -19634.99 |         |
| Dispersion Energy:              | -0.049208791961361                          | -1.3390   | -30.88   | -129.20   |         |
| Total Bonding Energy:           | -8.382379398211159                          | -228.0961 | -5260.02 | -22007.93 |         |
| Temp                            |                                             | Transl    | Rotat    | Vibrat    | Total   |
| ----                            |                                             | -----     | -----    | -----     | -----   |
| 298.15                          | Entropy (cal/mole-K):                       | 43.101    | 33.524   | 72.847    | 149.471 |
|                                 | Internal Energy (Kcal/mole):                | 0.889     | 0.889    | 198.496   | 200.273 |
|                                 | Constant Volume Heat Capacity (cal/mole-K): | 2.981     | 2.981    | 71.314    | 77.275  |

Summary of energy terms

|                    | hartree            | eV        | kcal/mol | kJ/mol    |
|--------------------|--------------------|-----------|----------|-----------|
| Bond Energy:       | -8.382379398211144 | -228.0961 | -5260.02 | -22007.93 |
| Internal Energy:   | 0.319155810897418  | 8.6847    | 200.27   | 837.94    |
| pV/n = RT:         | 0.000944186013486  | 0.0257    | 0.59     | 2.48      |
| Enthalpy H:        | -8.062279401300239 | -219.3858 | -5059.16 | -21167.51 |
| -T*S:              | -0.071018634905051 | -1.9325   | -44.56   | -186.46   |
| Gibbs free energy: | -8.133298036205291 | -221.3183 | -5103.72 | -21353.97 |

## Mc

Summary of Bonding Energy (energy terms are taken from the energy decomposition above)

|                                 |                                             |           |          |           |         |
|---------------------------------|---------------------------------------------|-----------|----------|-----------|---------|
| Electrostatic Energy:           | -5.118105135167852                          | -139.2707 | -3211.66 | -13437.58 |         |
| Kinetic Energy:                 | 5.955072558349208                           | 162.0458  | 3736.86  | 15635.04  |         |
| Coulomb (Steric+OrbInt) Energy: | -1.553863893698669                          | -42.2828  | -975.06  | -4079.67  |         |
| XC Energy:                      | -5.905521166762420                          | -160.6974 | -3705.77 | -15504.94 |         |
| Dispersion Energy:              | -0.036839588347286                          | -1.0025   | -23.12   | -96.72    |         |
| Total Bonding Energy:           | -6.659257225627018                          | -181.2076 | -4178.75 | -17483.88 |         |
| Temp                            |                                             | Transl    | Rotat    | Vibrat    | Total   |
| ----                            |                                             | -----     | -----    | -----     | -----   |
| 298.15                          | Entropy (cal/mole-K):                       | 42.462    | 32.390   | 51.516    | 126.367 |
|                                 | Internal Energy (Kcal/mole):                | 0.889     | 0.889    | 157.303   | 159.080 |
|                                 | Constant Volume Heat Capacity (cal/mole-K): | 2.981     | 2.981    | 53.397    | 59.359  |

Summary of energy terms

|                    | hartree            | eV        | kcal/mol | kJ/mol    |
|--------------------|--------------------|-----------|----------|-----------|
| Bond Energy:       | -6.659257225627024 | -181.2076 | -4178.75 | -17483.88 |
| Internal Energy:   | 0.253510473708243  | 6.8984    | 159.08   | 665.59    |
| pV/n = RT:         | 0.000944186013486  | 0.0257    | 0.59     | 2.48      |
| Enthalpy H:        | -6.404802565905294 | -174.2835 | -4019.07 | -16815.81 |
| -T*S:              | -0.060041239265174 | -1.6338   | -37.68   | -157.64   |
| Gibbs free energy: | -6.464843805170469 | -175.9174 | -4056.75 | -16973.45 |

# NiNHAc

## anag

Summary of Bonding Energy (energy terms are taken from the energy decomposition above)

|                                 |                                             |           |          |           |         |
|---------------------------------|---------------------------------------------|-----------|----------|-----------|---------|
| Electrostatic Energy:           | -6.603164551264070                          | -179.6812 | -4143.55 | -17336.61 |         |
| Kinetic Energy:                 | 7.926801375027338                           | 215.6992  | 4974.14  | 20811.81  |         |
| Coulomb (Steric+OrbInt) Energy: | -2.216382173030333                          | -60.3108  | -1390.80 | -5819.11  |         |
| XC Energy:                      | -7.822907020969547                          | -212.8721 | -4908.95 | -20539.04 |         |
| Dispersion Energy:              | -0.050655449002885                          | -1.3784   | -31.79   | -133.00   |         |
| Total Bonding Energy:           | -8.766307819239497                          | -238.5434 | -5500.94 | -23015.94 |         |
| Temp                            |                                             | Transl    | Rotat    | Vibrat    | Total   |
| 298.15                          | Entropy (cal/mole-K):                       | 43.082    | 33.916   | 77.508    | 154.505 |
|                                 | Internal Energy (Kcal/mole):                | 0.889     | 0.889    | 214.594   | 216.371 |
|                                 | Constant Volume Heat Capacity (cal/mole-K): | 2.981     | 2.981    | 75.548    | 81.510  |

### Summary of energy terms

|                    | hartree            | eV        | kcal/mol | kJ/mol    |
|--------------------|--------------------|-----------|----------|-----------|
| Bond Energy:       | -8.766307819239490 | -238.5434 | -5500.94 | -23015.94 |
| Internal Energy:   | 0.344809651936253  | 9.3827    | 216.37   | 905.30    |
| pV/n = RT:         | 0.000944186013486  | 0.0257    | 0.59     | 2.48      |
| Enthalpy H:        | -8.420553981289752 | -229.1349 | -5283.98 | -22108.16 |
| -T*S:              | -0.073410476685001 | -1.9976   | -46.07   | -192.74   |
| Gibbs free energy: | -8.493964457974753 | -231.1325 | -5330.04 | -22300.90 |

## TS-ag

Summary of Bonding Energy (energy terms are taken from the energy decomposition above)

|                                 |                                             |           |          |           |         |
|---------------------------------|---------------------------------------------|-----------|----------|-----------|---------|
| Electrostatic Energy:           | -6.618890551811025                          | -180.1092 | -4153.42 | -17377.89 |         |
| Kinetic Energy:                 | 8.025771321833005                           | 218.3923  | 5036.25  | 21071.66  |         |
| Coulomb (Steric+OrbInt) Energy: | -2.262446810697277                          | -61.5643  | -1419.71 | -5940.05  |         |
| XC Energy:                      | -7.831252521938652                          | -213.0992 | -4914.19 | -20560.95 |         |
| Dispersion Energy:              | -0.053067503891949                          | -1.4440   | -33.30   | -139.33   |         |
| Total Bonding Energy:           | -8.739886066505898                          | -237.8244 | -5484.36 | -22946.57 |         |
| Temp                            |                                             | Transl    | Rotat    | Vibrat    | Total   |
| 298.15                          | Entropy (cal/mole-K):                       | 43.082    | 33.742   | 75.584    | 152.408 |
|                                 | Internal Energy (Kcal/mole):                | 0.889     | 0.889    | 213.597   | 215.374 |
|                                 | Constant Volume Heat Capacity (cal/mole-K): | 2.981     | 2.981    | 73.528    | 79.490  |

### Summary of energy terms

|                    | hartree            | eV        | kcal/mol | kJ/mol    |
|--------------------|--------------------|-----------|----------|-----------|
| Bond Energy:       | -8.739886066505898 | -237.8244 | -5484.36 | -22946.57 |
| Internal Energy:   | 0.343220828282581  | 9.3395    | 215.37   | 901.13    |
| pV/n = RT:         | 0.000944186013486  | 0.0257    | 0.59     | 2.48      |
| Enthalpy H:        | -8.395721052209831 | -228.4592 | -5268.40 | -22042.96 |
| -T*S:              | -0.072413792470265 | -1.9705   | -45.44   | -190.12   |
| Gibbs free energy: | -8.468134844680096 | -230.4297 | -5313.84 | -22233.08 |

## ag

Summary of Bonding Energy (energy terms are taken from the energy decomposition above)

|                                 |                    |           |          |           |
|---------------------------------|--------------------|-----------|----------|-----------|
| Electrostatic Energy:           | -6.654608627538131 | -181.0811 | -4175.83 | -17471.67 |
| Kinetic Energy:                 | 7.983345170808306  | 217.2379  | 5009.63  | 20960.27  |
| Coulomb (Steric+OrbInt) Energy: | -2.206046682850911 | -60.0296  | -1384.32 | -5791.97  |
| XC Energy:                      | -7.814947049202123 | -212.6555 | -4903.95 | -20518.14 |
| Dispersion Energy:              | -0.052286014406801 | -1.4228   | -32.81   | -137.28   |
| Total Bonding Energy:           | -8.744543203189661 | -237.9511 | -5487.28 | -22958.79 |

Summary of Bonding Energy (energy terms are taken from the energy decomposition above)

|                                 |                    |           |          |           |
|---------------------------------|--------------------|-----------|----------|-----------|
| Electrostatic Energy:           | -6.654608627538131 | -181.0811 | -4175.83 | -17471.67 |
| Kinetic Energy:                 | 7.983345170808306  | 217.2379  | 5009.63  | 20960.27  |
| Coulomb (Steric+OrbInt) Energy: | -2.206046682850911 | -60.0296  | -1384.32 | -5791.97  |
| XC Energy:                      | -7.814947049202123 | -212.6555 | -4903.95 | -20518.14 |
| Dispersion Energy:              | -0.052286014406801 | -1.4228   | -32.81   | -137.28   |
| Total Bonding Energy:           | -8.744543203189661 | -237.9511 | -5487.28 | -22958.79 |

## TS-CH

Summary of Bonding Energy (energy terms are taken from the energy decomposition above)

|                                 |                    |           |          |           |       |
|---------------------------------|--------------------|-----------|----------|-----------|-------|
| Electrostatic Energy:           | -6.702496092709029 | -182.3842 | -4205.88 | -17597.40 |       |
| Kinetic Energy:                 | 8.013117422015640  | 218.0480  | 5028.31  | 21038.44  |       |
| Coulomb (Steric+OrbInt) Energy: | -2.178449131861001 | -59.2786  | -1367.00 | -5719.52  |       |
| XC Energy:                      | -7.821470858909673 | -212.8331 | -4908.05 | -20535.27 |       |
| Dispersion Energy:              | -0.052931236705792 | -1.4403   | -33.21   | -138.97   |       |
| Total Bonding Energy:           | -8.742229898169855 | -237.8882 | -5485.83 | -22952.72 |       |
| Temp                            |                    | Transl    | Rotat    | Vibrat    | Total |



|        |                                             |        |        |         |         |
|--------|---------------------------------------------|--------|--------|---------|---------|
| 298.15 | Entropy (cal/mole-K):                       | 43.082 | 33.616 | 74.016  | 150.714 |
|        | Internal Energy (Kcal/mole):                | 0.889  | 0.889  | 211.144 | 212.922 |
|        | Constant Volume Heat Capacity (cal/mole-K): | 2.981  | 2.981  | 74.368  | 80.329  |

Summary of energy terms

|                    | hartree            | eV        | kcal/mol | kJ/mol    |
|--------------------|--------------------|-----------|----------|-----------|
| Bond Energy:       | -8.742229898169848 | -237.8882 | -5485.83 | -22952.72 |
| Internal Energy:   | 0.339312038722489  | 9.2332    | 212.92   | 890.86    |
| pV/n = RT:         | 0.000944186013486  | 0.0257    | 0.59     | 2.48      |
| Enthalpy H:        | -8.401973673433872 | -228.6293 | -5272.32 | -22059.38 |
| -T*S:              | -0.071608932020188 | -1.9486   | -44.94   | -188.01   |
| Gibbs free energy: | -8.473582605454061 | -230.5779 | -5317.25 | -22247.39 |

## McH

Summary of Bonding Energy (energy terms are taken from the energy decomposition above)

|                                 |                    |           |          |           |
|---------------------------------|--------------------|-----------|----------|-----------|
| Electrostatic Energy:           | -6.672492679529544 | -181.5678 | -4187.05 | -17518.63 |
| Kinetic Energy:                 | 7.919109299717633  | 215.4899  | 4969.32  | 20791.62  |
| Coulomb (Steric+OrbInt) Energy: | -2.141651517333571 | -58.2773  | -1343.91 | -5622.91  |
| XC Energy:                      | -7.809132864793972 | -212.4973 | -4900.31 | -20502.88 |
| Dispersion Energy:              | -0.052838398522390 | -1.4378   | -33.16   | -138.73   |
| Total Bonding Energy:           | -8.757006160461845 | -238.2903 | -5495.10 | -22991.52 |

| Temp | Transl | Rotat | Vibrat | Total |
|------|--------|-------|--------|-------|
| ---- | -----  | ----- | -----  | ----- |

|        |                                             |        |        |         |         |
|--------|---------------------------------------------|--------|--------|---------|---------|
| 298.15 | Entropy (cal/mole-K):                       | 43.082 | 33.644 | 78.357  | 155.083 |
|        | Internal Energy (Kcal/mole):                | 0.889  | 0.889  | 214.384 | 216.162 |
|        | Constant Volume Heat Capacity (cal/mole-K): | 2.981  | 2.981  | 75.496  | 81.458  |

Summary of energy terms

|                    | hartree            | eV        | kcal/mol | kJ/mol    |
|--------------------|--------------------|-----------|----------|-----------|
| Bond Energy:       | -8.757006160461858 | -238.2903 | -5495.10 | -22991.52 |
| Internal Energy:   | 0.344475460543754  | 9.3737    | 216.16   | 904.42    |
| pV/n = RT:         | 0.000944186013486  | 0.0257    | 0.59     | 2.48      |
| Enthalpy H:        | -8.411586513904616 | -228.8909 | -5278.35 | -22084.62 |
| -T*S:              | -0.073684873011834 | -2.0051   | -46.24   | -193.46   |
| Gibbs free energy: | -8.485271386916450 | -230.8960 | -5324.59 | -22278.08 |

## Mc

Summary of Bonding Energy (energy terms are taken from the energy decomposition above)

|                                 |                    |           |          |           |
|---------------------------------|--------------------|-----------|----------|-----------|
| Electrostatic Energy:           | -5.259330402481648 | -143.1137 | -3300.28 | -13808.37 |
| Kinetic Energy:                 | 6.165075604686471  | 167.7602  | 3868.64  | 16186.40  |
| Coulomb (Steric+OrbInt) Energy: | -1.615917278616745 | -43.9713  | -1014.00 | -4242.59  |
| XC Energy:                      | -6.089486197966085 | -165.7034 | -3821.21 | -15987.94 |
| Dispersion Energy:              | -0.037963424420575 | -1.0330   | -23.82   | -99.67    |
| Total Bonding Energy:           | -6.837621698798582 | -186.0612 | -4290.67 | -17952.17 |

| Temp | Transl | Rotat | Vibrat | Total |
|------|--------|-------|--------|-------|
| ---- | -----  | ----- | -----  | ----- |

|        |                                             |        |        |         |         |
|--------|---------------------------------------------|--------|--------|---------|---------|
| 298.15 | Entropy (cal/mole-K):                       | 42.450 | 32.372 | 50.075  | 124.898 |
|        | Internal Energy (Kcal/mole):                | 0.889  | 0.889  | 164.526 | 166.303 |
|        | Constant Volume Heat Capacity (cal/mole-K): | 2.981  | 2.981  | 55.188  | 61.149  |

Summary of energy terms

|                    | hartree            | eV        | kcal/mol | kJ/mol    |
|--------------------|--------------------|-----------|----------|-----------|
| Bond Energy:       | -6.837621698798586 | -186.0612 | -4290.67 | -17952.17 |
| Internal Energy:   | 0.265021164792401  | 7.2116    | 166.30   | 695.81    |
| pV/n = RT:         | 0.000944186013486  | 0.0257    | 0.59     | 2.48      |
| Enthalpy H:        | -6.571656347992699 | -178.8239 | -4123.78 | -17253.88 |
| -T*S:              | -0.059342859898169 | -1.6148   | -37.24   | -155.80   |
| Gibbs free energy: | -6.630999207890867 | -180.4387 | -4161.02 | -17409.69 |

**DLPNO-CCSD(T)/ def2-TVZP computations and LED analysis**

Table 1: DLPNO-CCSD(T)/def2-TVPZ energies and LED analysis for **PdOAc**. All energies in  $E_h$ .

|                             | <b>anag</b> | <b>TS-ag</b> | <b>ag</b>   | <b>TS-CH</b> | <b>McH*</b> |
|-----------------------------|-------------|--------------|-------------|--------------|-------------|
| $E_{\text{tot}}$            | -988.614851 | -988.588842  | -988.592355 | -988.584215  | -988.635028 |
| $E_{\text{intra}}^{(1)}$    | -126.144213 | -126.177036  | -126.111932 | -126.084027  | -126.008614 |
| $E_{\text{intra}}^{(2)}$    | -403.006924 | -402.923501  | -402.687030 | -402.435956  | -401.847146 |
| $E_{\text{intra}}^{(3)}$    | -227.514141 | -227.553801  | -227.609678 | -227.579818  | -227.684104 |
| $E_{\text{intra}}^{(4)}$    | -227.612177 | -227.603442  | -227.609678 | -227.693779  | -227.748313 |
| $E_{\text{intra}}^{(5)}$    | 0.000000    | 0.000000     | 0.000000    | 0.000000     | 0.000000    |
| $E_{\text{inter}}^{(1-2)}$  | -1.204259   | -1.424109    | -1.806613   | -2.222278    | -3.360041   |
| $E_{\text{elstat}}^{(1-2)}$ | -1.074383   | -1.277989    | -1.601674   | -1.944570    | -2.926796   |
| $E_{\text{exch}}^{(1-2)}$   | -0.093690   | -0.104318    | -0.147488   | -0.203516    | -0.329903   |
| $E_{\text{corr}}^{(1-2)}$   | -0.036186   | -0.041803    | -0.057451   | -0.074192    | -0.103342   |
| $E_{\text{disp}}^{(1-2)}$   | -0.014998   | -0.017009    | -0.021555   | -0.027265    | -0.040205   |
| $E_{\text{inter}}^{(1-3)}$  | -1.382729   | -1.274586    | -1.219228   | -1.116565    | -0.916707   |
| $E_{\text{elstat}}^{(1-3)}$ | -1.239227   | -1.151301    | -1.102543   | -1.014070    | -0.838886   |
| $E_{\text{exch}}^{(1-3)}$   | -0.101804   | -0.089906    | -0.085427   | -0.073923    | -0.055947   |
| $E_{\text{corr}}^{(1-3)}$   | -0.041698   | -0.033381    | -0.031259   | -0.028573    | -0.021874   |
| $E_{\text{disp}}^{(1-3)}$   | -0.012551   | -0.010029    | -0.008782   | -0.008198    | -0.007132   |
| $E_{\text{inter}}^{(2-3)}$  | 0.209086    | 0.237948     | 0.252607    | 0.207039     | 0.213207    |
| $E_{\text{elstat}}^{(2-3)}$ | 0.230415    | 0.267575     | 0.288591    | 0.283661     | 0.238703    |
| $E_{\text{exch}}^{(2-3)}$   | -0.011079   | -0.017306    | -0.020166   | -0.048417    | -0.013909   |
| $E_{\text{corr}}^{(2-3)}$   | -0.010250   | -0.012321    | -0.015818   | -0.028206    | -0.011587   |
| $E_{\text{disp}}^{(2-3)}$   | -0.005122   | -0.005044    | -0.005829   | -0.007662    | -0.005507   |
| $E_{\text{inter}}^{(1-4)}$  | -1.179528   | -1.199643    | -1.199461   | -1.093559    | -0.640961   |
| $E_{\text{elstat}}^{(1-4)}$ | -1.065276   | -1.080226    | -1.083731   | -0.994563    | -0.603028   |
| $E_{\text{exch}}^{(1-4)}$   | -0.083410   | -0.086649    | -0.084433   | -0.071809    | -0.026133   |
| $E_{\text{corr}}^{(1-4)}$   | -0.030842   | -0.032768    | -0.031403   | -0.027176    | -0.011800   |
| $E_{\text{disp}}^{(1-4)}$   | -0.009324   | -0.008935    | -0.008971   | -0.008281    | -0.004978   |
| $E_{\text{inter}}^{(2-4)}$  | 0.127169    | 0.15887705   | 0.183136    | 0.181281     | 0.168923    |
| $E_{\text{elstat}}^{(2-4)}$ | 0.151837    | 0.183134     | 0.211126    | 0.211282     | 0.189974    |
| $E_{\text{exch}}^{(2-4)}$   | -0.011520   | -0.011490    | -0.014264   | -0.016130    | -0.011282   |
| $E_{\text{corr}}^{(2-4)}$   | -0.013148   | -0.012767    | -0.013726   | -0.013871    | -0.009768   |
| $E_{\text{disp}}^{(2-4)}$   | -0.007623   | -0.006818    | -0.007169   | -0.007024    | -0.005787   |
| $E_{\text{inter}}^{(3-4)}$  | 0.186490    | 0.196986     | 0.192767    | 0.186535     | 0.136887    |
| $E_{\text{elstat}}^{(3-4)}$ | 0.199482    | 0.208641     | 0.203773    | 0.195832     | 0.184751    |
| $E_{\text{exch}}^{(3-4)}$   | -0.007787   | -0.005748    | -0.005369   | -0.004332    | -0.030803   |
| $E_{\text{corr}}^{(3-4)}$   | -0.005204   | -0.005907    | -0.005636   | -0.004965    | -0.017061   |

|                             |           |           |           |           |           |
|-----------------------------|-----------|-----------|-----------|-----------|-----------|
| $E_{\text{disp}}^{(3-4)}$   | -0.001847 | -0.002972 | -0.002756 | -0.002892 | -0.004631 |
| $E_{\text{inter}}^{(1-5)}$  | 0.358001  | 0.481465  | 0.566576  | 0.548724  | 0.354890  |
| $E_{\text{elstat}}^{(1-5)}$ | 0.358001  | 0.481465  | 0.566576  | 0.548724  | 0.354890  |
| $E_{\text{exch}}^{(1-5)}$   | 0.000000  | 0.000000  | 0.000000  | 0.000000  | 0.000000  |
| $E_{\text{corr}}^{(1-5)}$   | 0.000000  | 0.000000  | 0.000000  | 0.000000  | 0.000000  |
| $E_{\text{disp}}^{(1-5)}$   | 0.000000  | 0.000000  | 0.000000  | 0.000000  | 0.000000  |
| $E_{\text{inter}}^{(2-5)}$  | -1.121058 | -1.131621 | -1.126940 | -0.841898 | -0.165151 |
| $E_{\text{elstat}}^{(2-5)}$ | -1.121058 | -1.131621 | -1.126940 | -0.841898 | -0.165151 |
| $E_{\text{exch}}^{(2-5)}$   | 0.000000  | 0.000000  | 0.000000  | 0.000000  | 0.000000  |
| $E_{\text{corr}}^{(2-5)}$   | 0.000000  | 0.000000  | 0.000000  | 0.000000  | 0.000000  |
| $E_{\text{disp}}^{(2-5)}$   | 0.000000  | 0.000000  | 0.000000  | 0.000000  | 0.000000  |
| $E_{\text{inter}}^{(3-5)}$  | -0.199510 | -0.258280 | -0.282197 | -0.474643 | -0.439011 |
| $E_{\text{elstat}}^{(3-5)}$ | -0.199510 | -0.258280 | -0.282197 | -0.474643 | -0.439011 |
| $E_{\text{exch}}^{(3-5)}$   | 0.000000  | 0.000000  | 0.000000  | 0.000000  | 0.000000  |
| $E_{\text{corr}}^{(3-5)}$   | 0.000000  | 0.000000  | 0.000000  | 0.000000  | 0.000000  |
| $E_{\text{disp}}^{(3-5)}$   | 0.000000  | 0.000000  | 0.000000  | 0.000000  | 0.000000  |
| $E_{\text{inter}}^{(4-5)}$  | -0.131060 | -0.148099 | -0.167589 | -0.165272 | -0.698884 |
| $E_{\text{elstat}}^{(4-5)}$ | -0.131060 | -0.148099 | -0.167589 | -0.165272 | -0.698884 |
| $E_{\text{exch}}^{(4-5)}$   | 0.000000  | 0.000000  | 0.000000  | 0.000000  | 0.000000  |
| $E_{\text{corr}}^{(4-5)}$   | 0.000000  | 0.000000  | 0.000000  | 0.000000  | 0.000000  |
| $E_{\text{disp}}^{(4-5)}$   | 0.000000  | 0.000000  | 0.000000  | 0.000000  | 0.000000  |

Table 2: DLPNO-CCSD(T)/def2-TVPZ energies and LED analysis for **PdNHAc**. All energies in  $E_h$ .

|                             | <b>anag</b> | <b>TS-ag</b> | <b>ag</b>   | <b>TS-CH</b> | <b>McH</b>  |
|-----------------------------|-------------|--------------|-------------|--------------|-------------|
| $E_{\text{tot}}$            | -948.877896 | -948.854060  | -948.858762 | -948.849523  | -948.878642 |
| $E_{\text{intra}}^{(1)}$    | -126.114543 | -126.104972  | -126.078147 | -126.067041  | -126.042010 |
| $E_{\text{intra}}^{(2)}$    | -403.087409 | -403.019325  | -402.891284 | -402.684895  | -402.320980 |
| $E_{\text{intra}}^{(3)}$    | -207.460043 | -207.397682  | -207.449925 | -207.421048  | -207.443217 |
| $E_{\text{intra}}^{(4)}$    | -207.494423 | -207.480712  | -207.449925 | -207.585840  | -207.806127 |
| $E_{\text{intra}}^{(5)}$    | 0.000000    | 0.000000     | 0.000000    | 0.000000     | 0.000000    |
| $E_{\text{inter}}^{(1-2)}$  | -1.105237   | -1.297327    | -1.551812   | -1.908547    | -2.704495   |
| $E_{\text{elstat}}^{(1-2)}$ | -0.990276   | -1.168028    | -1.387506   | -1.680254    | -2.357568   |
| $E_{\text{exch}}^{(1-2)}$   | -0.082145   | -0.090809    | -0.116460   | -0.165305    | -0.258780   |
| $E_{\text{corr}}^{(1-2)}$   | -0.032811   | -0.038489    | -0.047846   | -0.062988    | -0.034398   |
| $E_{\text{disp}}^{(1-2)}$   | -0.014176   | -0.017036    | -0.018982   | -0.024674    | -0.034398   |
| $E_{\text{inter}}^{(1-3)}$  | -1.597127   | -1.604561    | -1.563438   | -1.454814    | -1.133904   |
| $E_{\text{elstat}}^{(1-3)}$ | -1.422085   | -1.433053    | -1.394175   | -1.300446    | -1.019439   |
| $E_{\text{exch}}^{(1-3)}$   | -0.126121   | -0.129011    | -0.127039   | -0.114515    | -0.084031   |
| $E_{\text{corr}}^{(1-3)}$   | -0.048921   | -0.043507    | -0.042224   | -0.039853    | -0.030433   |
| $E_{\text{disp}}^{(1-3)}$   | -0.015008   | -0.012769    | -0.011957   | -0.011473    | -0.009880   |
| $E_{\text{inter}}^{(2-3)}$  | 0.223528    | 0.254256     | 0.260792    | 0.214444     | 0.251121    |
| $E_{\text{elstat}}^{(2-3)}$ | 0.248687    | 0.285921     | 0.297372    | 0.296933     | 0.293717    |
| $E_{\text{exch}}^{(2-3)}$   | -0.013299   | -0.017758    | -0.020102   | -0.051737    | -0.023850   |
| $E_{\text{corr}}^{(2-3)}$   | -0.011859   | -0.013907    | -0.016478   | -0.030751    | -0.018745   |
| $E_{\text{disp}}^{(2-3)}$   | -0.005818   | -0.00594941  | -0.006382   | -0.008326    | -0.007099   |
| $E_{\text{inter}}^{(1-4)}$  | -1.454294   | -1.469448    | -1.526635   | -1.358770    | -1.061295   |
| $E_{\text{elstat}}^{(1-4)}$ | -1.295144   | -1.305133    | -1.360382   | -1.218008    | -0.963711   |
| $E_{\text{exch}}^{(1-4)}$   | -0.118724   | -0.122483    | -0.124446   | -0.104585    | -0.071220   |
| $E_{\text{corr}}^{(1-4)}$   | -0.040427   | -0.041831    | -0.041807   | -0.036176    | -0.026365   |
| $E_{\text{disp}}^{(1-4)}$   | -0.012268   | -0.012073    | -0.118789   | -0.011111    | -0.008817   |
| $E_{\text{inter}}^{(2-4)}$  | 0.112267    | 0.131714     | 0.184161    | 0.178662     | 0.160340    |
| $E_{\text{elstat}}^{(2-4)}$ | 0.141293    | 0.163173     | 0.214352    | 0.211993     | 0.196944    |
| $E_{\text{exch}}^{(2-4)}$   | -0.138485   | -0.015806    | -0.015500   | -0.017998    | -0.020548   |
| $E_{\text{corr}}^{(2-4)}$   | -0.015178   | -0.015653    | -0.014692   | -0.015334    | -0.016055   |
| $E_{\text{disp}}^{(2-4)}$   | -0.008543   | -0.008439    | -0.007517   | -0.007366    | -0.007654   |
| $E_{\text{inter}}^{(3-4)}$  | 0.205862    | 0.202229     | 0.200737    | 0.200496     | 0.168588    |
| $E_{\text{elstat}}^{(3-4)}$ | 0.223765    | 0.220915     | 0.220066    | 0.215665     | 0.179882    |
| $E_{\text{exch}}^{(3-4)}$   | -0.010416   | -0.010109    | -0.010441   | -0.007776    | -0.005334   |
| $E_{\text{corr}}^{(3-4)}$   | -0.007487   | -0.008577    | -0.008888   | -0.007393    | -0.005960   |

|                             |           |           |           |           |           |
|-----------------------------|-----------|-----------|-----------|-----------|-----------|
| $E_{\text{disp}}^{(3-4)}$   | -0.002079 | -0.002876 | -0.003294 | -0.003115 | -0.002849 |
| $E_{\text{inter}}^{(1-5)}$  | 0.361163  | 0.475508  | 0.553749  | 0.529019  | 0.410902  |
| $E_{\text{elstat}}^{(1-5)}$ | 0.361163  | 0.475508  | 0.553749  | 0.529019  | 0.410902  |
| $E_{\text{exch}}^{(1-5)}$   | 0.000000  | 0.000000  | 0.000000  | 0.000000  | 0.000000  |
| $E_{\text{corr}}^{(1-5)}$   | 0.000000  | 0.000000  | 0.000000  | 0.000000  | 0.000000  |
| $E_{\text{disp}}^{(1-5)}$   | 0.000000  | 0.000000  | 0.000000  | 0.000000  | 0.000000  |
| $E_{\text{inter}}^{(2-5)}$  | -1.110780 | -1.124770 | -1.127063 | -0.836790 | -0.291471 |
| $E_{\text{elstat}}^{(2-5)}$ | -1.110780 | -1.124770 | -1.127063 | -0.836790 | -0.291471 |
| $E_{\text{exch}}^{(2-5)}$   | 0.000000  | 0.000000  | 0.000000  | 0.000000  | 0.000000  |
| $E_{\text{corr}}^{(2-5)}$   | 0.000000  | 0.000000  | 0.000000  | 0.000000  | 0.000000  |
| $E_{\text{disp}}^{(2-5)}$   | 0.000000  | 0.000000  | 0.000000  | 0.000000  | 0.000000  |
| $E_{\text{inter}}^{(3-5)}$  | -0.227271 | -0.269837 | -0.287950 | -0.487638 | -0.922348 |
| $E_{\text{elstat}}^{(3-5)}$ | -0.227271 | -0.269837 | -0.287950 | -0.487638 | -0.922348 |
| $E_{\text{exch}}^{(3-5)}$   | 0.000000  | 0.000000  | 0.000000  | 0.000000  | 0.000000  |
| $E_{\text{corr}}^{(3-5)}$   | 0.000000  | 0.000000  | 0.000000  | 0.000000  | 0.000000  |
| $E_{\text{disp}}^{(3-5)}$   | 0.000000  | 0.000000  | 0.000000  | 0.000000  | 0.000000  |
| $E_{\text{inter}}^{(4-5)}$  | -0.129589 | -0.149122 | -0.172465 | -0.166761 | -0.143746 |
| $E_{\text{elstat}}^{(4-5)}$ | -0.129589 | -0.149122 | -0.172465 | -0.166761 | -0.143746 |
| $E_{\text{exch}}^{(4-5)}$   | 0.000000  | 0.000000  | 0.000000  | 0.000000  | 0.000000  |
| $E_{\text{corr}}^{(4-5)}$   | 0.000000  | 0.000000  | 0.000000  | 0.000000  | 0.000000  |
| $E_{\text{disp}}^{(4-5)}$   | 0.000000  | 0.000000  | 0.000000  | 0.000000  | 0.000000  |

Table 3: DLPNO-CCSD(T)/def2-TVPZ energies and LED analysis for NiOAc. All energies in  $E_h$ .

|                             | <b>anag</b>  | <b>TS-ag</b> | <b>ag</b>    | <b>TS-CH</b> | <b>McH</b>   |
|-----------------------------|--------------|--------------|--------------|--------------|--------------|
| $E_{\text{tot}}$            | -2370.873582 | -2370.839042 | -2370.832599 | -2370.823087 | -2370.849138 |
| $E_{\text{intra}}^{(1)}$    | -1508.527792 | -1508.534666 | -1508.507563 | -1508.496742 | -1508.483405 |
| $E_{\text{intra}}^{(2)}$    | -402.899844  | -402.721913  | -402.328996  | -402.112114  | -402.887285  |
| $E_{\text{intra}}^{(3)}$    | -227.257483  | -227.439654  | -227.439108  | -227.412906  | -227.363413  |
| $E_{\text{intra}}^{(4)}$    | -227.461677  | -227.462836  | -227.475519  | -227.544834  | -227.662716  |
| $E_{\text{intra}}^{(5)}$    | 0.000000     | 0.000000     | 0.000000     | 0.000000     | 0.000000     |
| $E_{\text{inter}}^{(1-2)}$  | -1.277242    | -1.615421    | -2.123119    | -2.452593    | -3.015332    |
| $E_{\text{elstat}}^{(1-2)}$ | -1.181539    | -1.499446    | -1.949423    | -2.232483    | -2.719419    |
| $E_{\text{exch}}^{(1-2)}$   | -0.068053    | -0.082342    | -0.124176    | -0.156943    | -0.208019    |
| $E_{\text{corr}}^{(1-2)}$   | -0.027650    | -0.033632    | -0.049520    | -0.063167    | -0.087895    |
| $E_{\text{disp}}^{(1-2)}$   | -0.009907    | -0.011707    | -0.016107    | -0.020272    | -0.027580    |
| $E_{\text{inter}}^{(1-3)}$  | -1.610776    | -1.339738    | -1.308638    | -1.232025    | -1.046873    |
| $E_{\text{elstat}}^{(1-3)}$ | -1.486973    | -1.245081    | -1.214294    | -1.147129    | -0.982109    |
| $E_{\text{exch}}^{(1-3)}$   | -0.086802    | -0.067021    | -0.066410    | -0.059765    | -0.046169    |
| $E_{\text{corr}}^{(1-3)}$   | -0.037001    | -0.027637    | -0.027934    | -0.025132    | -0.018595    |
| $E_{\text{disp}}^{(1-3)}$   | -0.009705    | -0.007313    | -0.006754    | -0.006456    | -0.006037    |
| $E_{\text{inter}}^{(2-3)}$  | 0.213188     | 0.261745     | 0.264254     | 0.200665     | 0.246983     |
| $E_{\text{elstat}}^{(2-3)}$ | 0.234044     | 0.289540     | 0.301861     | 0.281376     | 0.280793     |
| $E_{\text{exch}}^{(2-3)}$   | -0.009239    | -0.014181    | -0.019687    | -0.049761    | -0.017090    |
| $E_{\text{corr}}^{(2-3)}$   | -0.011616    | -0.013614    | -0.017920    | -0.030950    | -0.016720    |
| $E_{\text{disp}}^{(2-3)}$   | -0.006391    | -0.006080    | -0.007181    | -0.008370    | -0.007386    |
| $E_{\text{inter}}^{(1-4)}$  | -1.298534    | -1.290519    | -1.280998    | -1.202590    | -1.056076    |
| $E_{\text{elstat}}^{(1-4)}$ | -1.204843    | -1.195752    | -1.188792    | -1.120390    | -0.991063    |
| $E_{\text{exch}}^{(1-4)}$   | -0.066777    | -0.066390    | -0.064513    | -0.057957    | -0.046517    |
| $E_{\text{corr}}^{(1-4)}$   | -0.026914    | -0.028377    | -0.027693    | -0.024242    | -0.018496    |
| $E_{\text{disp}}^{(1-4)}$   | -0.006962    | -0.006709    | -0.006662    | -0.006290    | -0.005658    |
| $E_{\text{inter}}^{(2-4)}$  | 0.135094     | 0.159010     | 0.180075     | 0.181000     | 0.176786     |
| $E_{\text{elstat}}^{(2-4)}$ | 0.159714     | 0.183172     | 0.207264     | 0.208313     | 0.202773     |
| $E_{\text{exch}}^{(2-4)}$   | -0.010841    | -0.010664    | -0.012325    | -0.012399    | -0.011965    |
| $E_{\text{corr}}^{(2-4)}$   | -0.013779    | -0.013498    | -0.014865    | -0.014915    | -0.014021    |
| $E_{\text{disp}}^{(2-4)}$   | -0.008165    | -0.007330    | -0.007936    | -0.007642    | -0.006992    |
| $E_{\text{inter}}^{(3-4)}$  | 0.201766     | 0.188460     | 0.184293     | 0.180086     | 0.170448     |
| $E_{\text{elstat}}^{(3-4)}$ | 0.212262     | 0.02069      | 0.197312     | 0.193108     | 0.186368     |
| $E_{\text{exch}}^{(3-4)}$   | -0.005037    | -0.005900    | -0.005694    | -0.005701    | -0.007266    |
| $E_{\text{corr}}^{(3-4)}$   | -0.005486    | -0.007709    | -0.007325    | -0.007322    | -0.008653    |

|                             |           |           |           |           |           |
|-----------------------------|-----------|-----------|-----------|-----------|-----------|
| $E_{\text{disp}}^{(3-4)}$   | -0.002490 | -0.004125 | -0.003846 | -0.004080 | -0.005232 |
| $E_{\text{inter}}^{(1-5)}$  | 0.392873  | 0.536944  | 0.618729  | 0.583204  | 0.465738  |
| $E_{\text{elstat}}^{(1-5)}$ | 0.392873  | 0.536944  | 0.618729  | 0.583204  | 0.465738  |
| $E_{\text{exch}}^{(1-5)}$   | 0.000000  | 0.000000  | 0.000000  | 0.000000  | 0.000000  |
| $E_{\text{corr}}^{(1-5)}$   | 0.000000  | 0.000000  | 0.000000  | 0.000000  | 0.000000  |
| $E_{\text{disp}}^{(1-5)}$   | 0.000000  | 0.000000  | 0.000000  | 0.000000  | 0.000000  |
| $E_{\text{inter}}^{(2-5)}$  | -1.131060 | -1.147404 | -1.137099 | -0.831049 | -0.303739 |
| $E_{\text{elstat}}^{(2-5)}$ | -1.131060 | -1.147404 | -1.137099 | -0.831049 | -0.303739 |
| $E_{\text{exch}}^{(2-5)}$   | 0.000000  | 0.000000  | 0.000000  | 0.000000  | 0.000000  |
| $E_{\text{corr}}^{(2-5)}$   | 0.000000  | 0.000000  | 0.000000  | 0.000000  | 0.000000  |
| $E_{\text{disp}}^{(2-5)}$   | 0.000000  | 0.000000  | 0.000000  | 0.000000  | 0.000000  |
| $E_{\text{inter}}^{(3-5)}$  | -0.207807 | -0.278367 | -0.307225 | -0.512079 | -0.911936 |
| $E_{\text{elstat}}^{(3-5)}$ | -0.207807 | -0.278367 | -0.307225 | -0.512079 | -0.911936 |
| $E_{\text{exch}}^{(3-5)}$   | 0.000000  | 0.000000  | 0.000000  | 0.000000  | 0.000000  |
| $E_{\text{corr}}^{(3-5)}$   | 0.000000  | 0.000000  | 0.000000  | 0.000000  | 0.000000  |
| $E_{\text{disp}}^{(3-5)}$   | 0.000000  | 0.000000  | 0.000000  | 0.000000  | 0.000000  |
| $E_{\text{inter}}^{(4-5)}$  | -0.144289 | -154683   | -0.171682 | -0.171110 | -0.178319 |
| $E_{\text{elstat}}^{(4-5)}$ | -0.144289 | -154683   | -0.171682 | -0.171110 | -0.178319 |
| $E_{\text{exch}}^{(4-5)}$   | 0.000000  | 0.000000  | 0.000000  | 0.000000  | 0.000000  |
| $E_{\text{corr}}^{(4-5)}$   | 0.000000  | 0.000000  | 0.000000  | 0.000000  | 0.000000  |
| $E_{\text{disp}}^{(4-5)}$   | 0.000000  | 0.000000  | 0.000000  | 0.000000  | 0.000000  |



Table 4: DLPNO-CCSD(T)/def2-TVPZ energies and LED analysis for NiNHAc. All energies in  $E_h$ .

|                             | <b>anag</b>  | <b>TS-ag</b> | <b>ag</b>    | <b>TS-CH</b> | <b>McH</b>   |
|-----------------------------|--------------|--------------|--------------|--------------|--------------|
| $E_{\text{tot}}$            | -2331.122911 | -2331.087911 | -2331.085494 | -2331.076661 | -2331.101760 |
| $E_{\text{intra}}^{(1)}$    | -1508.514856 | -1508.514131 | -1508.495393 | -1508.488449 | -1508.481100 |
| $E_{\text{intra}}^{(2)}$    | -402.958788  | -402.751891  | -402.524394  | -402.524394  | -402.102005  |
| $E_{\text{intra}}^{(3)}$    | -207.155827  | -207.273691  | -207.229759  | -207.212922  | -207.201967  |
| $E_{\text{intra}}^{(4)}$    | -207.341740  | -207.322438  | -207.331763  | -207.423464  | -207.600952  |
| $E_{\text{intra}}^{(5)}$    | 0.000000     | 0.000000     | 0.000000     | 0.000000     | 0.000000     |
| $E_{\text{inter}}^{(1-2)}$  | -1.204384    | -1.577006    | -1.910551    | -2.191513    | -1.758555    |
| $E_{\text{elstat}}^{(1-2)}$ | -1.116698    | -1.465229    | -1.761634    | -2.002714    | -2.493818    |
| $E_{\text{exch}}^{(1-2)}$   | -0.062156    | -0.079097    | -0.105897    | -0.134277    | -0.185728    |
| $E_{\text{corr}}^{(1-2)}$   | -0.025529    | -0.032680    | -0.043020    | -0.054522    | -0.185728    |
| $E_{\text{disp}}^{(1-2)}$   | -0.009511    | -0.011957    | -0.014735    | -0.018238    | -0.025155    |
| $E_{\text{inter}}^{(1-3)}$  | -1.856408    | -1.640052    | -1.663283    | -1.584566    | -1.336203    |
| $E_{\text{elstat}}^{(1-3)}$ | -1.705043    | -1.507830    | -1.535484    | -1.457111    | -1.233192    |
| $E_{\text{exch}}^{(1-3)}$   | -0.106571    | -0.093556    | -0.097119    | -0.090264    | -0.073638    |
| $E_{\text{corr}}^{(1-3)}$   | -0.044794    | -0.038666    | -0.040680    | -0.037191    | -0.029374    |
| $E_{\text{disp}}^{(1-3)}$   | -0.011689    | -0.010002    | -0.009461    | -0.009621    | -0.008154    |
| $E_{\text{inter}}^{(2-3)}$  | 0.228291     | 0.274304     | 0.277036     | 0.213416     | 0.243191     |
| $E_{\text{elstat}}^{(2-3)}$ | 0.251977     | 0.307068     | 0.318179     | 0.297731     | 0.288460     |
| $E_{\text{exch}}^{(2-3)}$   | -0.010615    | -0.016285    | -0.020969    | -0.051037    | -0.023530    |
| $E_{\text{corr}}^{(2-3)}$   | -0.013072    | -0.016478    | -0.020173    | -0.033278    | -0.021739    |
| $E_{\text{disp}}^{(2-3)}$   | -0.006636    | -0.006983    | -0.007305    | -0.009548    | -0.008449    |
| $E_{\text{inter}}^{(1-4)}$  | -1.540598    | -1.548435    | -1.552865    | -1.452451    | -1.244329    |
| $E_{\text{elstat}}^{(1-4)}$ | -1.415252    | -1.419407    | -1.426355    | -1.339822    | -1.156560    |
| $E_{\text{exch}}^{(1-4)}$   | -0.089399    | -0.090945    | -0.088853    | -0.080268    | -0.062809    |
| $E_{\text{corr}}^{(1-4)}$   | -0.036046    | -0.038083    | -0.037657    | -0.033361    | -0.024960    |
| $E_{\text{disp}}^{(1-4)}$   | -0.009347    | -0.008893    | -0.008582    | -0.007859    | -0.006921    |
| $E_{\text{inter}}^{(2-4)}$  | 0.112331     | 0.130751     | 0.176754     | 0.176814     | 0.172406     |
| $E_{\text{elstat}}^{(2-4)}$ | 0.141988     | 0.163573     | 0.206807     | 0.207509     | 0.202589     |
| $E_{\text{exch}}^{(2-4)}$   | -0.013435    | -0.015364    | -0.013599    | -0.013975    | -0.013890    |
| $E_{\text{corr}}^{(2-4)}$   | -0.016222    | -0.017458    | -0.016454    | -0.016720    | -0.016293    |
| $E_{\text{disp}}^{(2-4)}$   | -0.009337    | -0.009302    | -0.008218    | -0.008141    | -0.007870    |
| $E_{\text{inter}}^{(3-4)}$  | 0.209237     | 0.184456     | 0.184435     | 0.184956     | 0.160244     |

|                             |           |           |           |           |           |
|-----------------------------|-----------|-----------|-----------|-----------|-----------|
| $E_{\text{elstat}}^{(3-4)}$ | 0.224496  | 0.201701  | 0.202906  | 0.202653  | 0.178022  |
| $E_{\text{exch}}^{(3-4)}$   | -0.007267 | -0.008076 | -0.008556 | -0.008177 | -0.008471 |
| $E_{\text{corr}}^{(3-4)}$   | -0.007992 | -0.009168 | -0.009914 | -0.009520 | -0.009307 |
| $E_{\text{disp}}^{(3-4)}$   | -0.002829 | -0.003610 | -0.004302 | -0.004439 | -0.004703 |
| $E_{\text{inter}}^{(1-5)}$  | 0.391475  | 0.540281  | 0.602794  | 0.562033  | 0.429188  |
| $E_{\text{elstat}}^{(1-5)}$ | 0.391475  | 0.540281  | 0.602794  | 0.562033  | 0.429188  |
| $E_{\text{exch}}^{(1-5)}$   | 0.000000  | 0.000000  | 0.000000  | 0.000000  | 0.000000  |
| $E_{\text{corr}}^{(1-5)}$   | 0.000000  | 0.000000  | 0.000000  | 0.000000  | 0.000000  |
| $E_{\text{disp}}^{(1-5)}$   | 0.000000  | 0.000000  | 0.000000  | 0.000000  | 0.000000  |
| $E_{\text{inter}}^{(2-5)}$  | -1.123720 | -1.138080 | -1.122628 | -0.841017 | -0.310087 |
| $E_{\text{elstat}}^{(2-5)}$ | -1.123720 | -1.138080 | -1.122628 | -0.841017 | -0.310087 |
| $E_{\text{exch}}^{(2-5)}$   | 0.000000  | 0.000000  | 0.000000  | 0.000000  | 0.000000  |
| $E_{\text{corr}}^{(2-5)}$   | 0.000000  | 0.000000  | 0.000000  | 0.000000  | 0.000000  |
| $E_{\text{disp}}^{(2-5)}$   | 0.000000  | 0.000000  | 0.000000  | 0.000000  | 0.000000  |
| $E_{\text{inter}}^{(3-5)}$  | -0.230287 | -0.297707 | -0.324260 | -0.513062 | -0.919123 |
| $E_{\text{elstat}}^{(3-5)}$ | -0.230287 | -0.297707 | -0.324260 | -0.513062 | -0.919123 |
| $E_{\text{exch}}^{(3-5)}$   | 0.000000  | 0.000000  | 0.000000  | 0.000000  | 0.000000  |
| $E_{\text{corr}}^{(3-5)}$   | 0.000000  | 0.000000  | 0.000000  | 0.000000  | 0.000000  |
| $E_{\text{disp}}^{(3-5)}$   | 0.000000  | 0.000000  | 0.000000  | 0.000000  | 0.000000  |
| $E_{\text{inter}}^{(4-5)}$  | -0.137640 | -0.154272 | -0.171617 | -0.168448 | -0.152469 |
| $E_{\text{elstat}}^{(4-5)}$ | -0.137640 | -0.154272 | -0.171617 | -0.168448 | -0.152469 |
| $E_{\text{exch}}^{(4-5)}$   | 0.000000  | 0.000000  | 0.000000  | 0.000000  | 0.000000  |
| $E_{\text{corr}}^{(4-5)}$   | 0.000000  | 0.000000  | 0.000000  | 0.000000  | 0.000000  |
| $E_{\text{disp}}^{(4-5)}$   | 0.000000  | 0.000000  | 0.000000  | 0.000000  | 0.000000  |

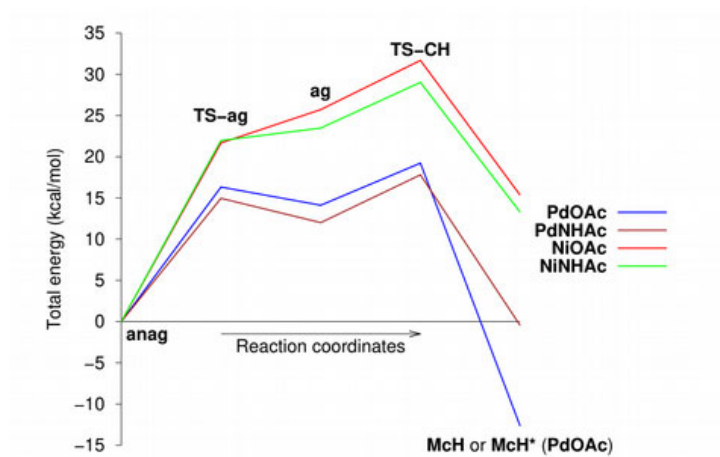

**Figure S 8** Total energy profile computed at the DLPNO-CCSD(T)/def2-TZVP level of theory from the DFT-optimized geometries. All energies expressed relative to **anag**.

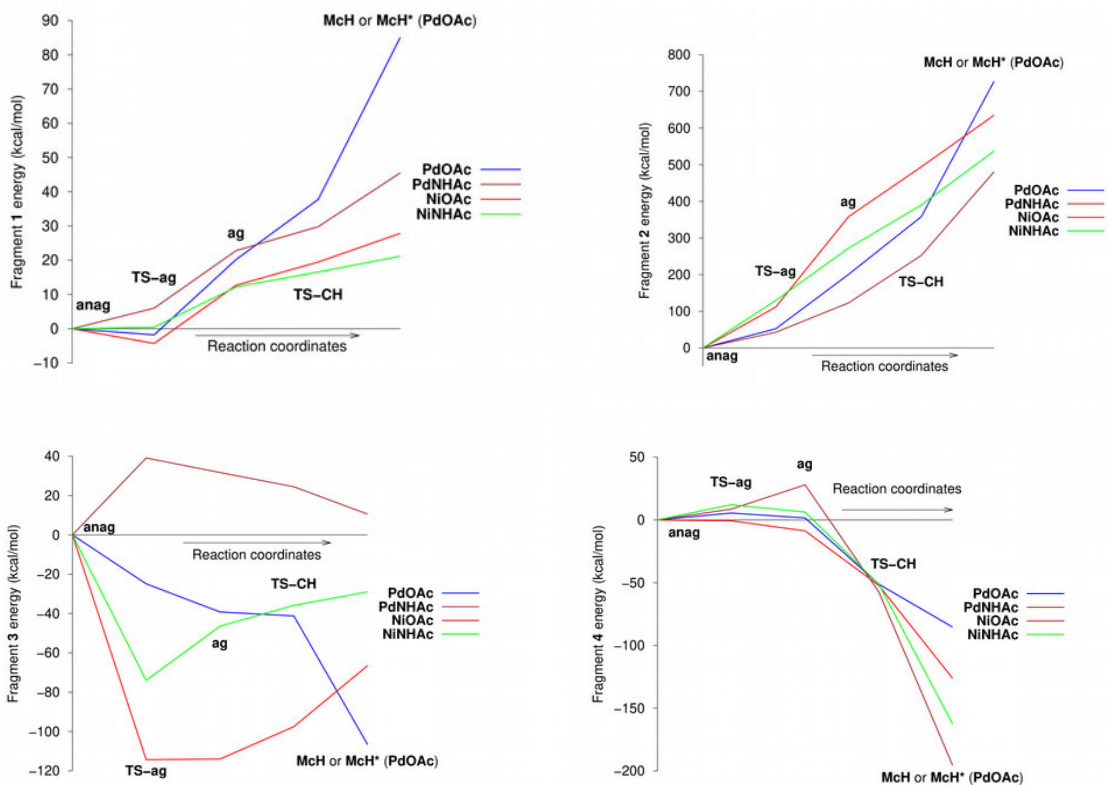

**Figure S 9.** Fragment energy plots along the reaction path for fragments 1 (top left), 2 (top right), 3 (bottom left) and 4 (bottom right). All energies expressed relative to **anag**.

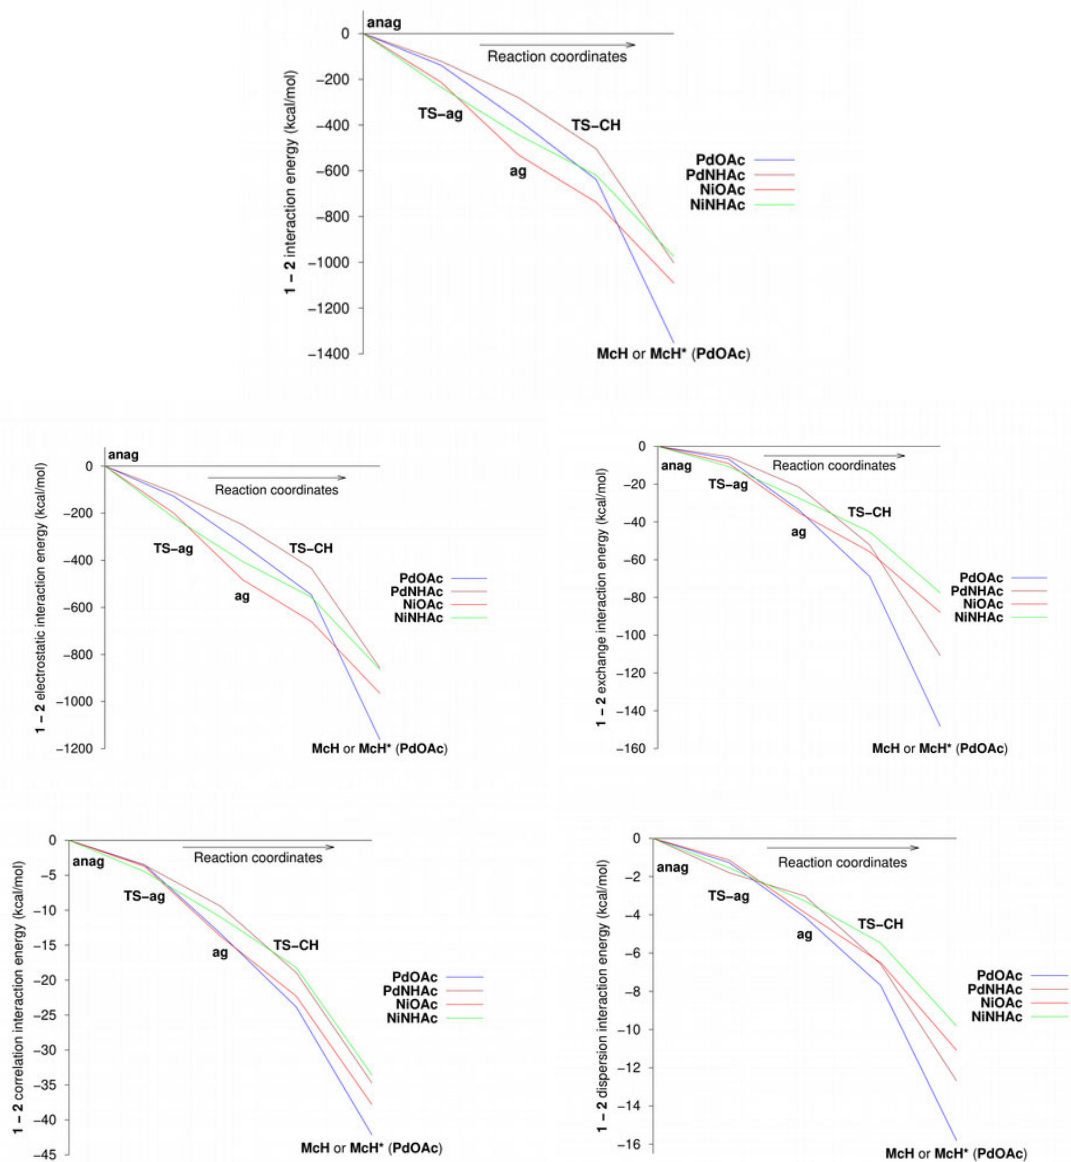

**Figure S 10** Interaction energy contributions plots along the reaction path for the interaction between fragments 1 and 2. Interaction energy (top), electrostatic contribution (middle left), exchange contribution (middle right), correlation contribution (bottom left) and dispersion contribution (bottom right). All energies expressed relative to **anag**.

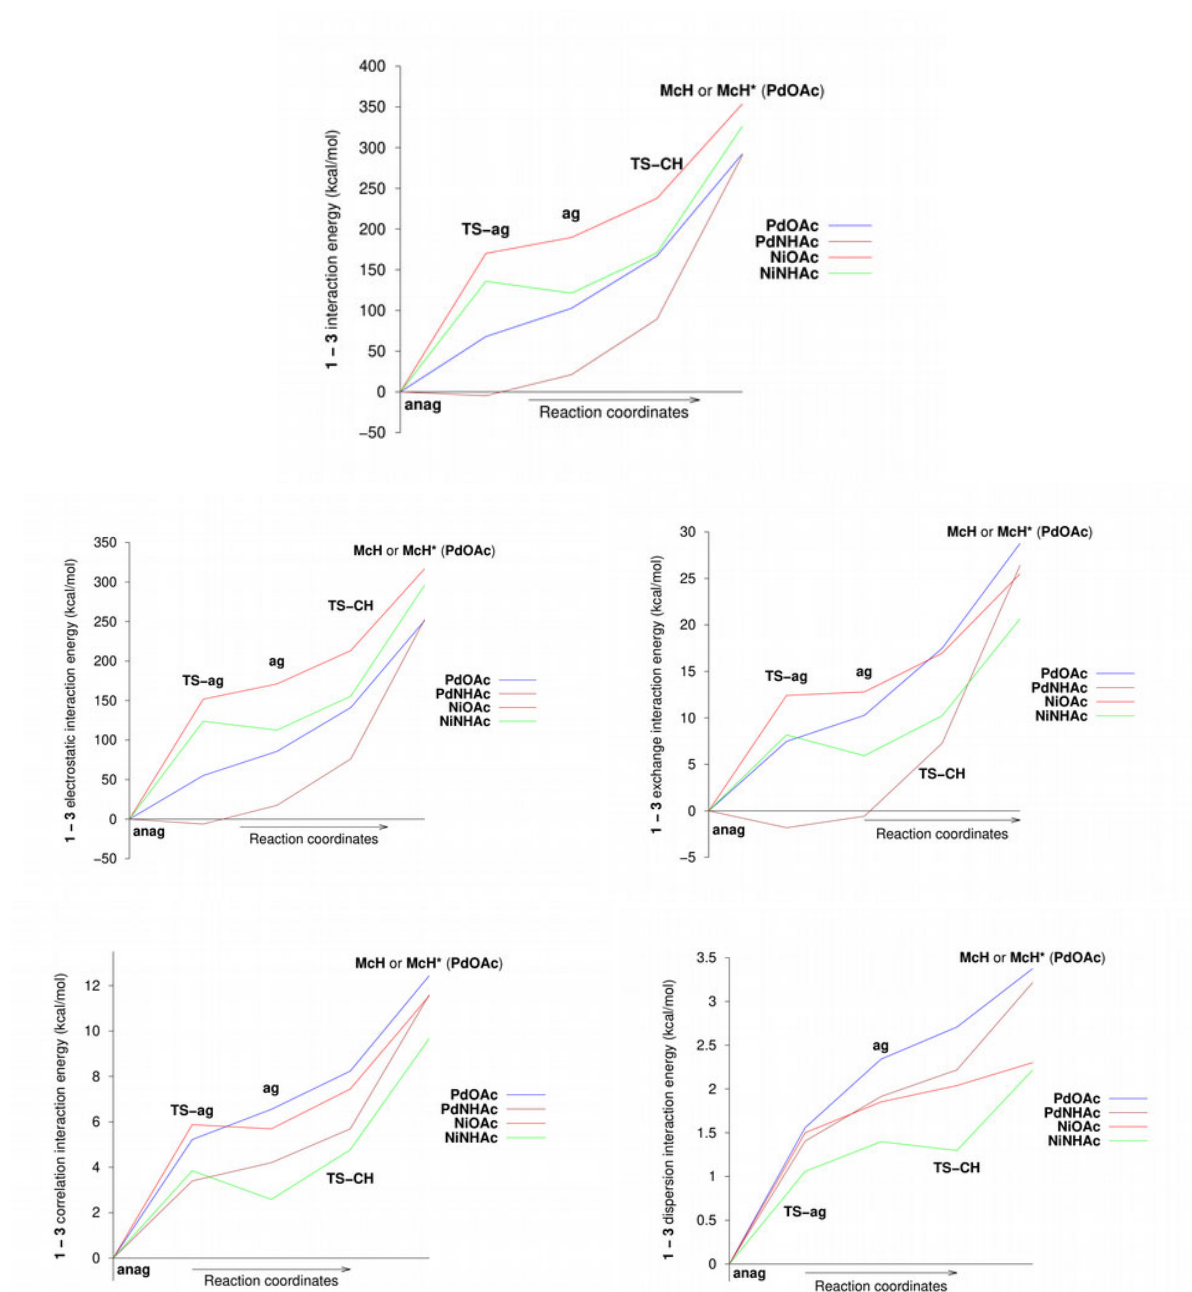

**Figure S 11** Interaction energy contributions plots along the reaction path for the interaction between fragments **1** and **3**. Interaction energy (top), electrostatic contribution (middle left), exchange contribution (middle right), correlation contribution (bottom left) and dispersion contribution (bottom right). All energies expressed relative to **anag**.

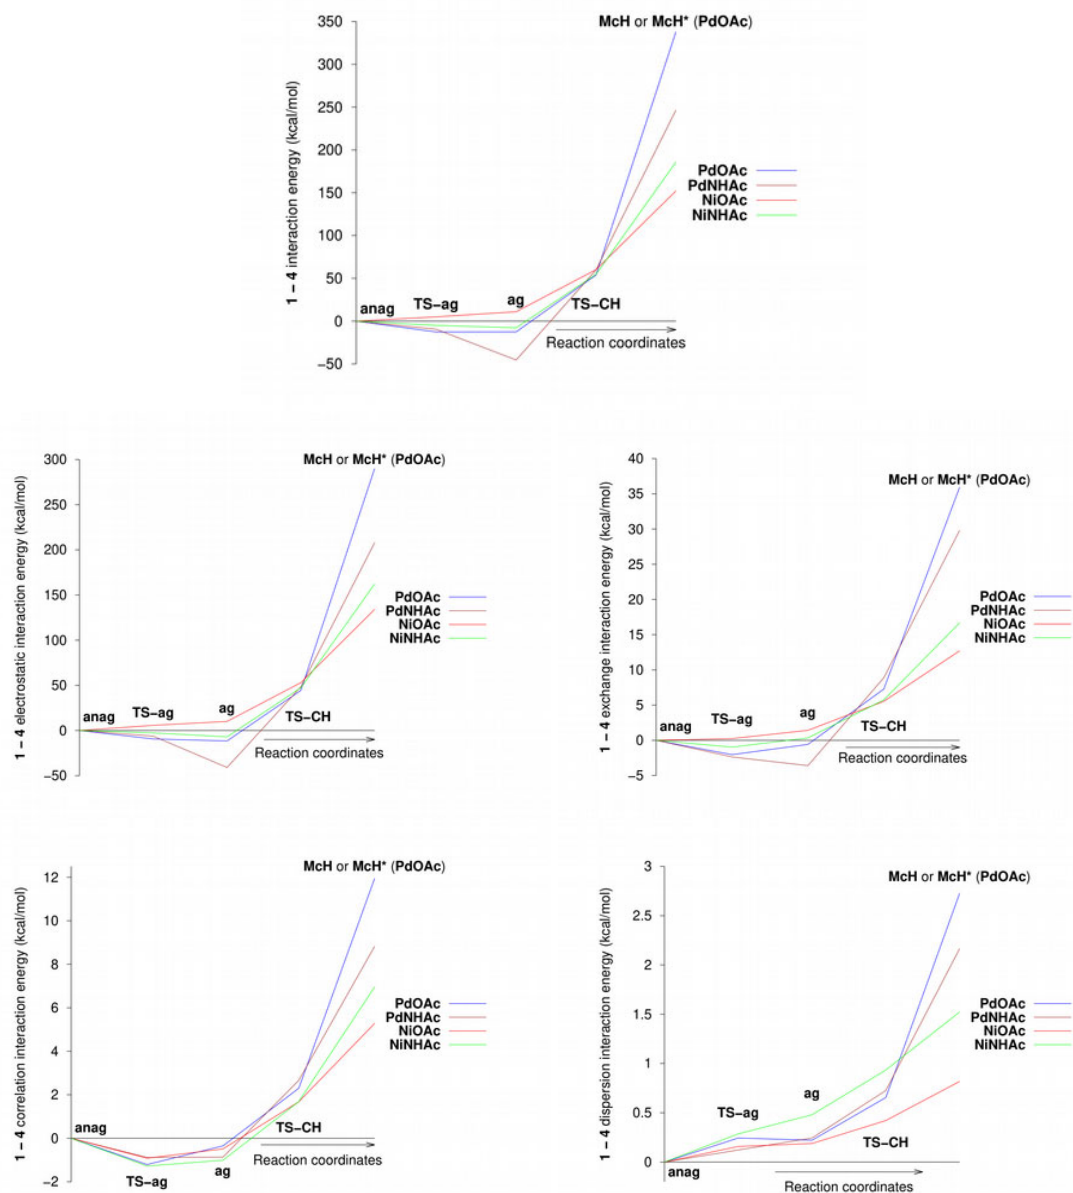

**Figure S 12.** Interaction energy contributions plots along the reaction path for the interaction between fragments **1** and **4**. Interaction energy (top), electrostatic contribution (middle left), exchange contribution (middle right), correlation contribution (bottom left) and dispersion contribution (bottom right). All energies expressed relative to **anag**.

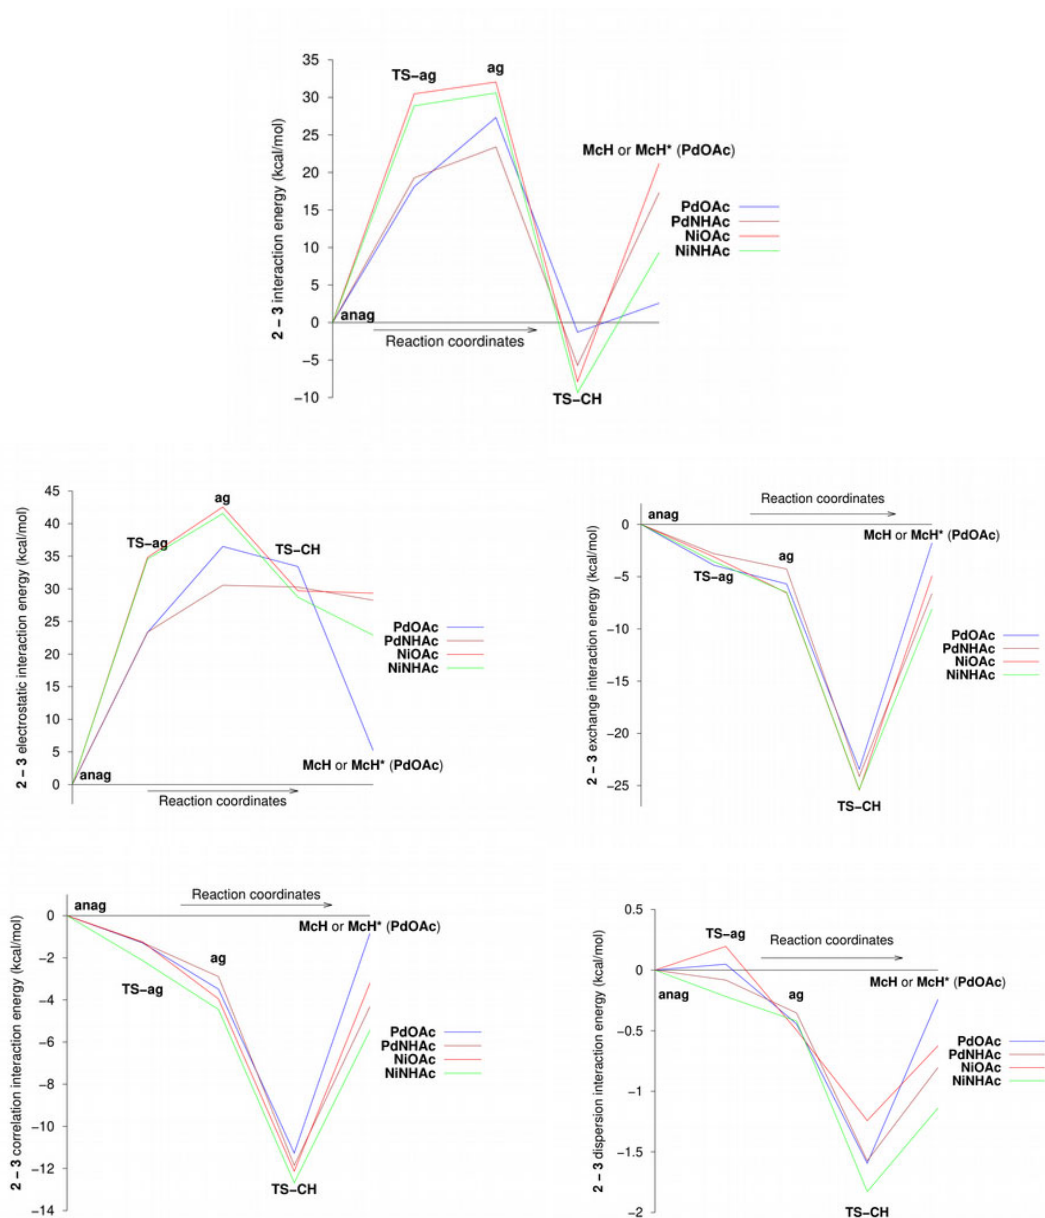

**Figure S 13.** Interaction energy contributions plots along the reaction path for the interaction between fragments **2** and **3**. Interaction energy (top), electrostatic contribution (middle left), exchange contribution (middle right), correlation contribution (bottom left) and dispersion contribution (bottom right). All energies expressed relative to **anag**.



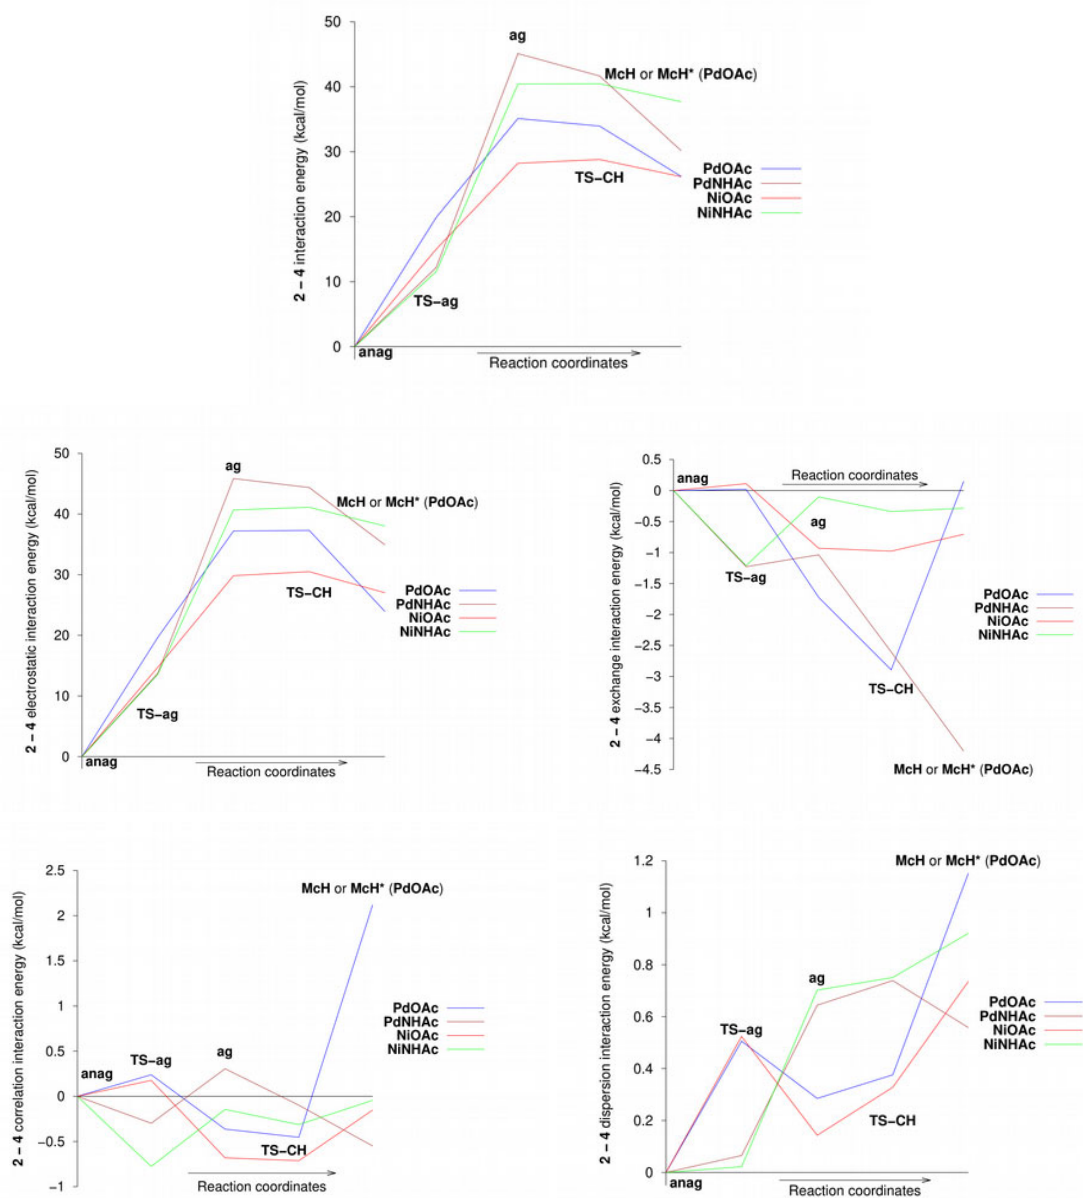

**Figure S 14.** Interaction energy contributions plots along the reaction path for the interaction between fragments 2 and 4. Interaction energy (top), electrostatic contribution (middle left), exchange contribution (middle right), correlation contribution (bottom left) and dispersion contribution (bottom right). All energies expressed relative to **anag**.

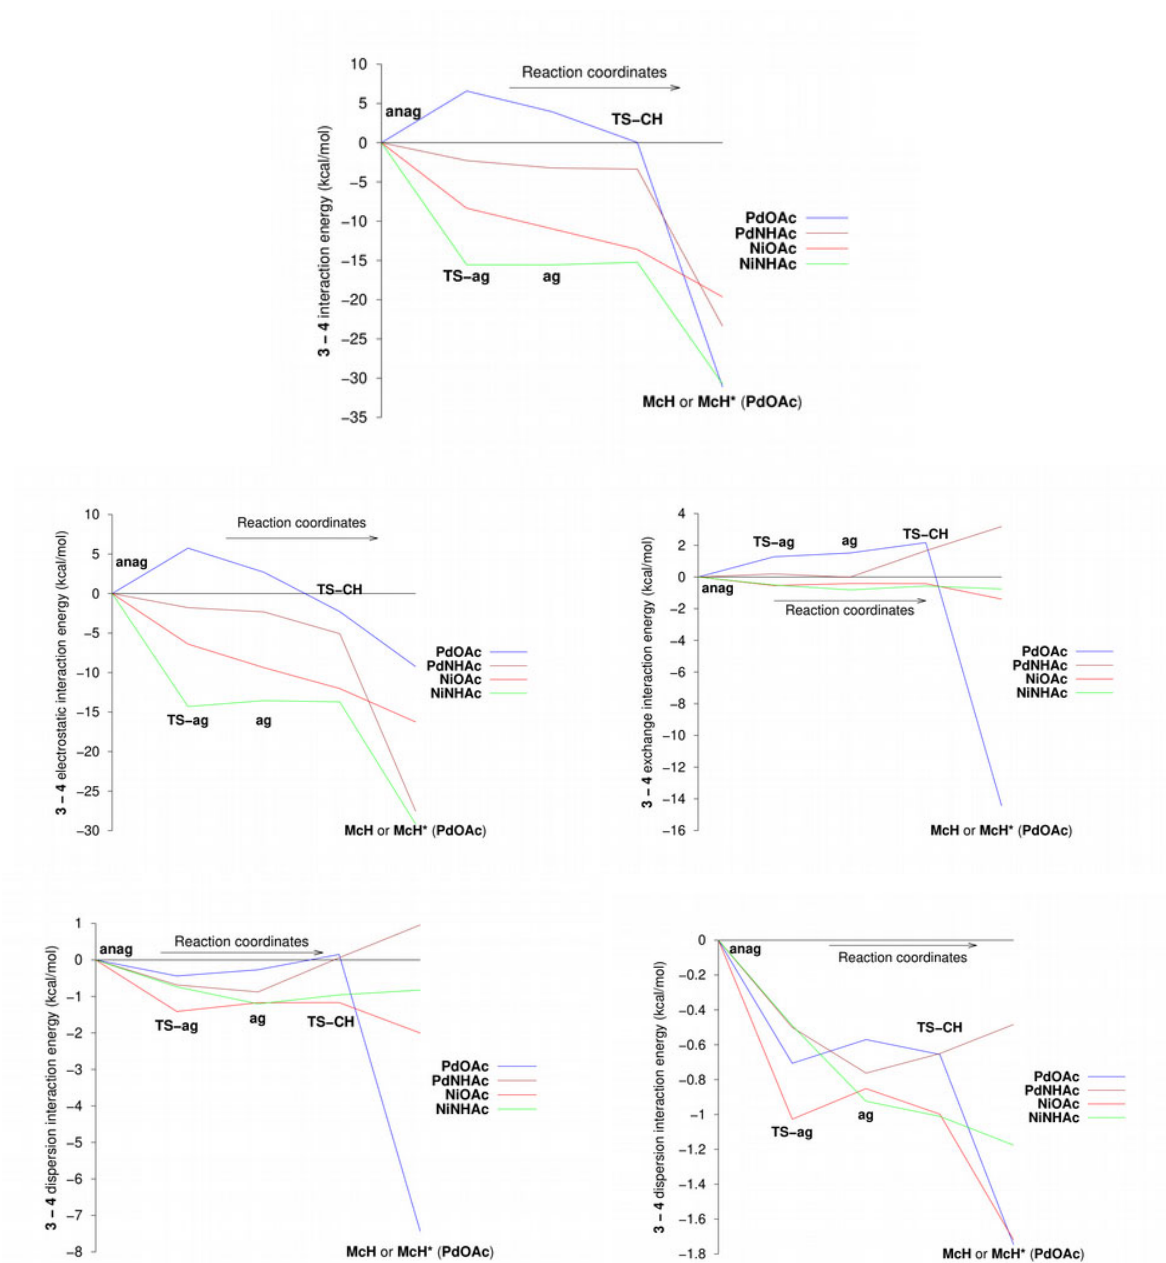

**Figure S 15.** Interaction energy contributions plots along the reaction path for the interaction between fragments 3 and 4. Interaction energy (top), electrostatic contribution (middle left), exchange contribution (middle right), correlation contribution (bottom left) and dispersion contribution (bottom right). All energies expressed relative to anag.

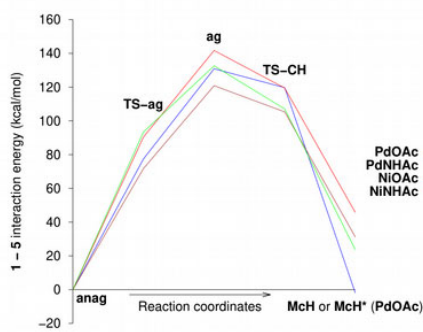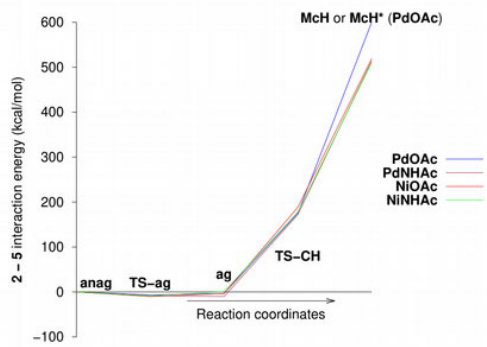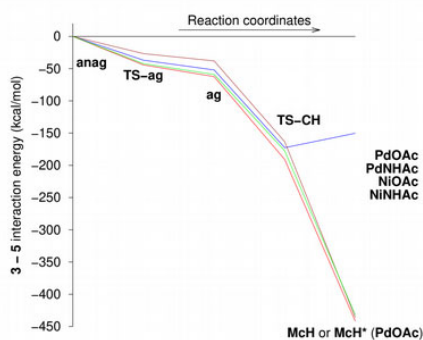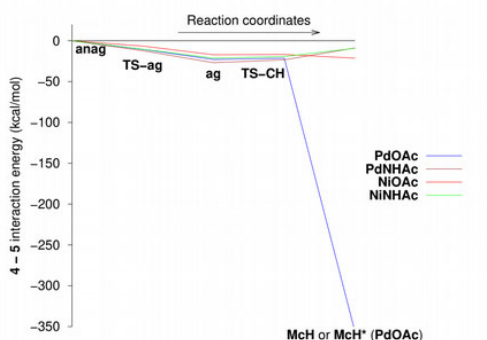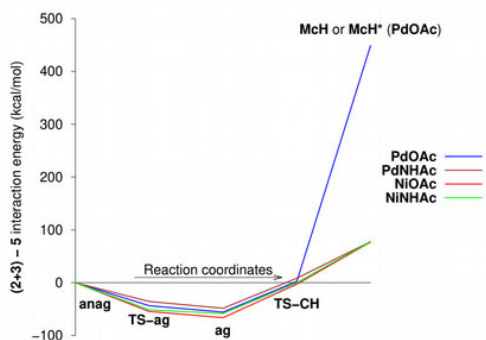

**Figure S 16.** Interaction energy plots along the reaction path for the interaction between fragments 1 and 5 (top left), 2 and 5 (top right), 3 and 5 (middle left), 4 and 5 (middle right), and “superfragment” 2+3 and fragment 5. All energies expressed relative to **anag**.

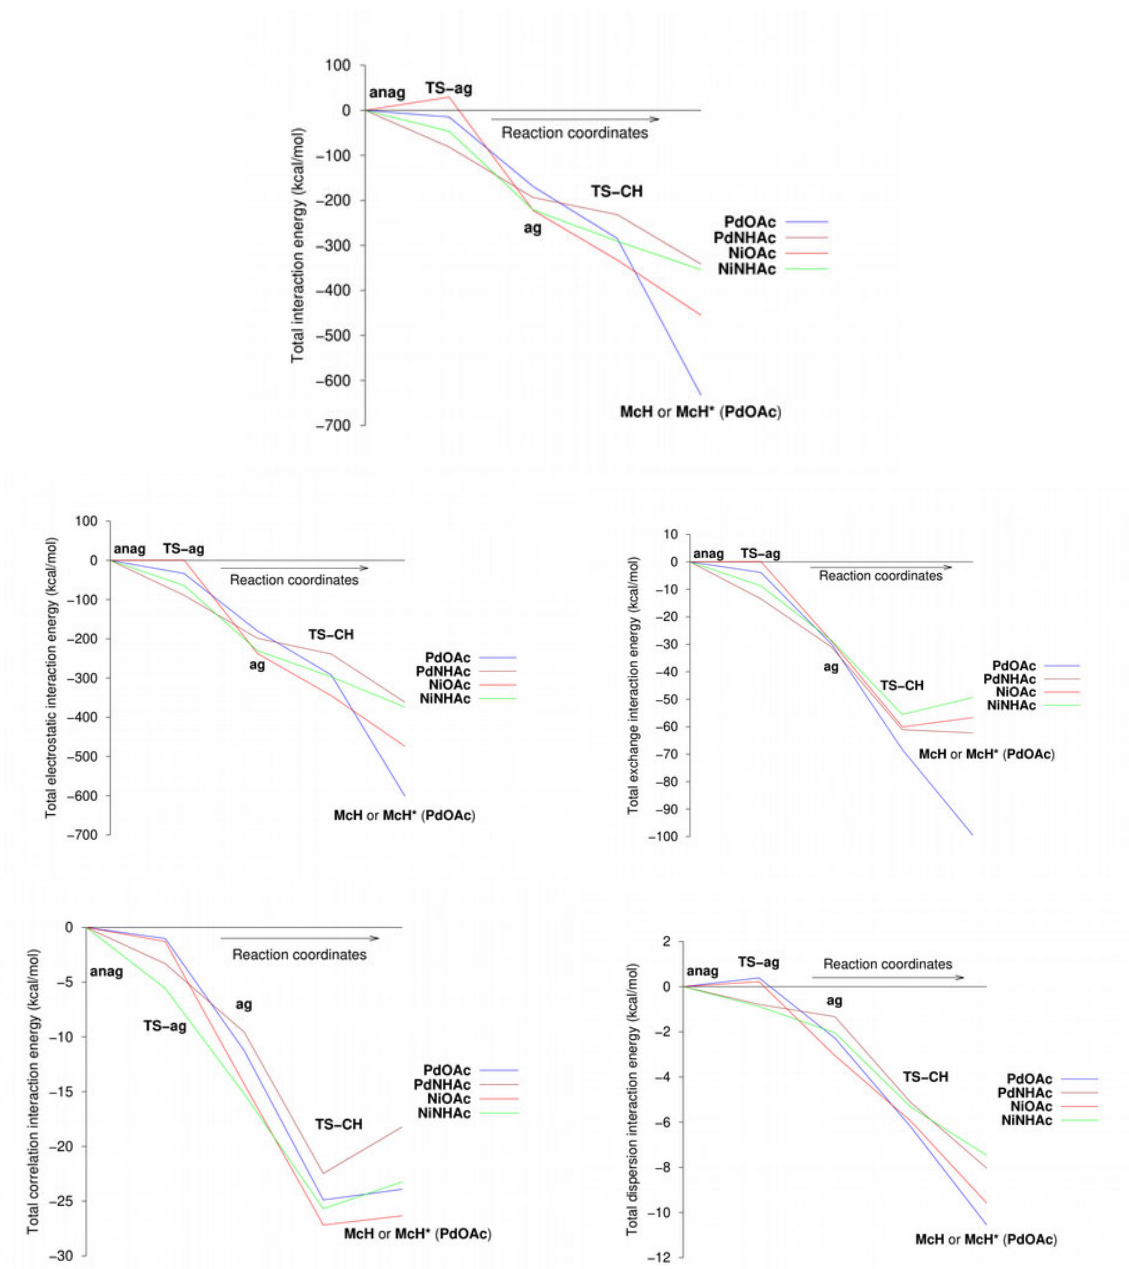

**Figure S 17.** Interaction energy contributions plots along the reaction path for the total interaction. Interaction energy (top), electrostatic contribution (middle left), exchange contribution (middle right), correlation contribution (bottom left) and dispersion contribution (bottom right). All energies expressed relative to **anag**.
